# Supplementary material for: The Program of Gene Transcription for a Single Differentiating Cell Type during Sporulation in Bacillus subtilis
Source: PLoS Biol. 2004 Sep 21;2(10):e328. doi: 10.1371/journal.pbio.0020328 (PMC517825; doi:10.1371/journal.pbio.0020328)
Supplement: Table S4 — (238 KB XLS). [file pbio.0020328.st004.xls]

## Sheet: Sheet1
POSSIBLE OPERON ORGANIZATION	GENE	PROMOTER PREDICTION					GENE	TRANSCRIPTIONAL PROFILING EXPERIMENTS												GENE	PRESUMED FUNCTION (SubtiList and Swiss-Prot)	Functional category (SubtiList)	GENE	Synonyms	SEARCH FOR PARALOGS		GENE	SEARCH FOR ORTHOLOGUES								GENE	PREDICTION TRANSMEMBRANE SEGMENTS
		-35	Spacing	-10	Transcription start site	distance to AUG		SigK DATA:			SigK DATA:			GerE DATA:			GerE DATA:								high similarity	low similarity		B. anthracis	B. cereus	B. halodurans	O. iheyensis	C. acetobutylicum	C. perfringens	L. monocytogenes	L. innocua		From TM pred server (http://www.ch.embnet.org/software/TMPRED_form.html)
		GCACAATT	13-11	gCATANNNT	(bold and underlined)	(from last bp of -10)		INDUCTION			Hour 4.5			Hour 5.5			Hour 6.5								BLAST in SUBTILIST	BLAST in SUBTILIST		Ames	ATCC 14579		HTE 831	ATCC 824	str. 13	LISTILIST	LISTILIST
								sK			sK			GerE			GerE								E value> 1e-20	1e-20> E value> 1e-4
GENES IDENTIFIED BY TRANSCRIPTIONAL PROFILING EXPERIMENTS COMPARING sigK+ to sigK- STRAINS:								Ratio	Score		Ratio	Score		Ratio	Score		Ratio	Score							genes indicated in bold characters are mother cell-specific genes
1. sK-CONTROLLED GENES REPRESSED BY GerE:
1.1. Previously identified sK-controlled genes (with transcription start site mapped by primer extension):
1.1. A. Also identified by overexpression of sK
1.1. A. 1. repression observed at both time points
cotF	cotF	GAACAACA	11	GCATATGCT	GATATGGAAT (mapped sigK promoter)	35	cotF	7.31264	0.999858		8.09096	0.997		0.346678	0.001		0.197376	0		cotF	spore coat protein, proteolytic cleavage, isolated from yabGD spores	1.8 (Sporulation)	cotF	no	no	yraD, yraF, yraG, yhcQ	cotF	cotF (BA3121)/BA5241	no [BC4997 (yusN/cotF)]	BH0743 (yraD/cotF)	OB0829	CAC0613(yraD/yraF/cotF)	no	no	no	cotF	0 TM
		GAACA	14	GCATATGCTGA	BioOptimizer prediction-correct	33
yybR (not included in final total)	yybR	downstream of cotF (convergent), antisense?					yybR	0.659548	0.0563174		5.22396	0.998		0.447245	0.015		0.248494	0.0005		yybR			yybR				yybR									yybR
sigK (spoIVCB-spoIIIC)	spoIVCB	ACACAGAC	12	ACATACATT	TACATATAG (mapped sigK promoter)	41	spoIVCB	8.32565	0.999901		2.10863	0.975		0.259677	0		0.139291	0		spoIVCB	RNA polymerase sporulation mother cell-specific (late) sigma factor (sK N-terminal half)	3.5.1 (Initiation)	spoIVCB	sigK	sigE, sigF, sigG		spoIVCB	sigK (BA4566)	BC4336	sigK (BH1285)	sigK (OB1999)	CAC1770	sigK (CPE1768)	no [rpoD (sigA)]	no [rpoD (sigA)]	spoIVCB	1 TM (prosequence of pro-sigK)
		ACACA	15	ACATACATTTA	BioOptimizer prediction-correct	39
	spoIIIC						spoIIIC	13.3243	0.999912		8.31764	1		0.293798	0.0005		0.161148	0		spoIIIC	RNA polymerase sporulation mother cell-specific (late) sigma factor (sK C-terminal half)	3.5.1 (Initiation)	spoIIIC	sigK	sigE, sigF, sigG		spoIIIC	sigK (BA4566)	BC4336	sigK (BH1285)	sigK (OB1999)	CAC1770	sigK (CPE1768)	no [rpoD (sigA)]	no [rpoD (sigA)]	spoIIIC	NA
spoVK	spoVK	TCACAATC	11	GAATATCAT	ATAGAGAGA (mapped sigK promoter)	23	spoVK	5.45533	0.999767		3.31131	0.995		0.306257	0.002		0.123469	0		spoVK	disruption leads to the production of immature spores (AAA family of ATPases)	1.8 (Sporulation)	spoVK	spoVJ	no	ftsH	spoVK	spoVK (BA3839)	no [ftsH]/BCE3737	BH2363	spoVK (OB1647)	no [CAC0955 (ftsH)]	spoVK (CPE1547)	no [ftsH]	no [ftsH]	spoVK	0 TM
		TCACA	14	GAATATCATAT	BioOptimizer prediction-correct	21
1.1. A. 2. repression observed at second time point only
cotH	cotH	AATCCTCC	12	GTTAAGGAT	GAAGATCCTT (mapped sigK promoter)	106	cotH	4.7213	0.99962		11.4815	0.999		0.554324	0.0395		0.363765	0.0005		cotH	spore coat protein (inner)	1.8 (Sporulation)	cotH	ywrH	yisJ	no	cotH	cotH (BA2046)	BC2031	no	OB2511	no	no	no	no	cotH	0 TM
					BioOptimizer-no prediction	no
cotT-ctaO	cotT	ACACCCAA	12	GAATATGGT	AAAAGGAT (mapped sigK promoter)	"+33"	cotT	1.96459	0.962131		10.8643	1		0.639944	0.053		0.369667	0.002		cotT	spore coat protein (inner), isolated from yabGD spores	1.8 (Sporulation)	cotT	no	no	no	cotT	no	no	no	no	no	no	no	no	cotT	0-1 TM
		ACACC	15	GAATATGGTAA	BioOptimizer prediction-correct	"+35"
		TAACA	15	TAATACTATGA	BioOptimizer-inaccurate	no
	ctaO (yjdK)	predicted terminator between cotT and ctaO					ctaO (yjdK)	5.62632	0.98699		2.06063	0.981		0.918589	0.36		0.731703	0.101		ctaO (yjdK)	heme O synthase activity (similar to cytochrome c oxidase assembly factor)	1.4 (Membrane bioenergetics (electron transport chain and ATP synthase))	ctaO (yjdK)	yjdK	ctaB	no	ctaO (yjdK)	no	no	no [ctaB (BH2616)]	no [ctaB (OB1436)]	no	no	no [ctaB]	no [ctaB]	ctaO (yjdK)	8 TMs
spoVFAB-asd-dapG	spoVFA	TCACCGGT	12	TCATAAGAT	GAAGGGGA (mapped sigK promoter)	56	spoVFA	8.78295	0.999891		27.6058	1		0.585168	0.0425		0.349573	0.002		spoVFA	dipicolinate synthase subunit A	1.8 (Sporulation)	spoVFA	dpaA	no	no	spoVFA	spoVFA (BA3939)	BC3801	spoVFA (BH2403)	dpaA (OB1608)	no	no	no [lmo1579 (ald)]	no	spoVFA	0 TM
		TCACC	15	TCATAAGATGA	BioOptimizer prediction-correct	54
	spoVFB						spoVFB	11.0066	0.99995		41.9759	1		0.584551	0.036		0.376438	0.0035		spoVFB	dipicolinate synthase subunit B	1.8 (Sporulation)	spoVFB	dpaB	no	no	spoVFB	spoVFA (BA3937)	BC3800	spoVFB (BH2402)	dpaB (OB1609)	no	no	no	no	spoVFB	0 TM
	asd						asd	1.88858	0.985075		6.82339	0.998		0.593373	0.0375		0.344715	0.0005		asd	aspartate-semialdehyde dehydrogenase (EC 1.2.1.11)	2.2 (Metabolism of amino acids and related molecules)	asd	no	no	argC	asd	asd-2 (BA3937)	BC3799/BC2363	asd (BH2401)	OB1610	CAC0568	asd (CPE1904)	lmo1437	lin1476	asd	0-1 TM
	dapG						dapG	1.83198	0.98317		3.40408	0.996		0.759326	0.1475		0.507605	0.0055		dapG	aspartokinase I (alpha and beta subunits) (EC 2.7.2.4)	2.2 (Metabolism of amino acids and related molecules)	dapG	lssD	lysC, yclM	proJ, argB	dapG	dapG-1 (BA1811)/dapG-2 (BA3936)	BC3798/BC1748	dapG (BH2400)	dapG (OB1611)	CAC1810	dapG (CPE1678)	lmo1436	lin1475	dapG	1 TM (Cter)
dapA (not included in final total)	dapA	downstream of dapG (read-through)					dapA	1.53505	0.951004		1.93197	0.971		0.84173	0.247		0.597071	0.0445		dapA			dapA				dapA									dapA
yabG	yabG	GCACCACA	11	ACATAGGCT	AGAGAAGGA (mapped sigK promoter)	114	yabG	5.51938	0.99961		16.3305	0.998		0.643116	0.065		0.430328	0.0045		yabG	sporulation-specific protease involved in the proteolysis and maturation of spore coat proteins	1.8 (Sporulation)	yabG	no	no	no	yabG	BA0040	BC0047 (yabG)	BH0058	OB0051	CAC2905	CPE2217	no	no	yabG	0 TM
		GCACC	15	ACATAGGCTAG	BioOptimizer prediction-correct	112
1.1. B. below cut-off in sigK+ vs. sigK- experiments but identified by overexpression of sK
1.1. B. 1. repression observed at both time points
none
1.1. B. 2. repression observed at second time point only
cotM	cotM	TCACCCAT	12	GCATATGAT	GTAAAGCAA (mapped sigK promoter)	16	cotM	8.76484	0.999906		1.83	0.918		0.551515	0.0275		0.319987	0.0055		cotM	spore coat protein (outer)	1.8 (Sporulation)	cotM	yneL	no	no	cotM	cotM (BA3681)	BC3621	no	no	no	no	no	no	cotM	0 TM
					BioOptimizer-no prediction	no
yneK not included in final total	yneK	downstream of cotM (read-through)					yneK	1.63151	0.962208		1.16242	0.714		0.887202	0.32		0.586353	0.02		yneK			yneK				yneK									yneK
1.1. C. not identified by overexpression of sK
1.1. C. 1. repression observed at both time points
cotE	cotE	GCACACTA	12	GCATAAGAT	AACACGAAG (P2-promoter)	31	cotE	not on array			2.50035	0.974		0.288842	0.003		0.126126	0		cotE	spore coat protein (outer), morphogenetic protein	1.8 (Sporulation)	cotE	no	no	no	cotE	cotE (BA3906)	BC3770	cotE	cotE (OB1630)	no	no	no	no	cotE	0 TM
		GCACA	15	GCATAAGATAA	BioOptimizer prediction-correct	29
		GCACC	15	ACAGAAACTTT	BioOptimizer prediction-inaccurate	no
1.1. C. 2. repression observed at second time point only
cotA	cotA	TAACCATC	12	TCATTAACT	ATAGTACC (mapped sigK promoter)	40	cotA	1.57604	0.961049		97.7237	1		0.536008	0.0185		0.297392	0.001		cotA	spore coat protein (outer), brown pigmentation during sporogenesis	1.8 (Sporulation)	cotA	pig	no	no	cotA	BA1902	BC1830	BH2082	cotA (OB1346)	no	no	no	no	cotA	0 TM
					BioOptimizer-no prediction	no
1.2. Previously reported sK-controlled genes (but transcription start site had not been mapped):
1.2. A. also identified by overexpression of sK
1.2. A. 1. repression observed at both time points
1.2. A. 1. a) promoter confirmed by 5'RACE-PCR
none
1.2. A. 1. b) not tested by 5'RACE-PCR
gerPABCDEF	gerPA (yisH)	TCACGCAT	11	TCATAAGCT	predicted sigK promoter	83	gerPA (yisH)	not on array			23.7684	1		0.28488	0.0015		0.139906	0		gerPA (yisH)	spore germination protein, involved in the access of germinants to their receptor	1.9 (Germination)	gerPA (yisH)	yisH	no	gerPF, yueG	gerPA (yisH)	gerPA (BA1149)	gerPA	no	no	no	no	no	no	gerPA (yisH)	0-1 TM (Nter)
		TCACG	14	TCATAAGCTAT	BioOptimizer-prediction	81
	gerPB (yisG)						gerPB (yisG)	10.5218	0.999939		14.2889	1		0.360718	0.0015		0.220502	0.0145		gerPB (yisG)	spore germination protein, involved in the access of germinants to their receptor	1.9 (Germination)	gerPB (yisG)	yisG	no	no	gerPB (yisG)	gerPB (BA1148)	gerPB	no	no	no	no	no	no	gerPB (yisG)	0 TM
	gerPC (yisF)						gerPC (yisF)	47.3037	0.999976		42.7563	1		0.287376	0.0005		0.108383	0		gerPC (yisF)	spore germination protein, involved in the access of germinants to their receptor	1.9 (Germination)	gerPC (yisF)	yisF	no	no	gerPC (yisF)	gerPC (BA1147)	gerPC	no	no	no	no	no	no	gerPC (yisF)	0 TM
	gerPD (yisE)						gerPD (yisE)	12.3945	0.999968		31.0456	1		0.378604	0.0075		0.173577	0		gerPD (yisE)	spore germination protein, involved in the access of germinants to their receptor	1.9 (Germination)	gerPD (yisE)	yisE	no	no	gerPD (yisE)	gerPD (BA1146)	gerPD	no	no	no	no	no	no	gerPD (yisE)	0 TM
	gerPE (yisD)						gerPE (yisD)	12.1158	0.999964		22.2331	1		0.198489	0.0065		0.12893	0		gerPE (yisD)	spore germination protein, involved in the access of germinants to their receptor	1.9 (Germination)	gerPE (yisD)	yisD	no	no	gerPE (yisD)	gerPE (BA1145)	gerPE	no	no	no	no	no	no	gerPE (yisD)	0 TM
	gerPF (yisC)						gerPF (yisC)	13.2905	0.999971		8.26038	1		0.491149	0.0065		0.205107	0.0005		gerPF (yisC)	spore germination protein, involved in the access of germinants to their receptor	1.9 (Germination)	gerPF (yisC)	yisC	no	gerPA, yueG	gerPF (yisC)	gerPF-1 (BA1144)/gerPF-2 (BA2341)	gerPF	no	no	no	no	no	no	gerPF (yisC)	1 TM (Nter)
1.2. A. 2. repression observed at second time point only
1.2. A. 2. a) promoter confirmed by 5'RACE-PCR
tgl	tgl	TTTCATTG	12	GCATATCTT	ATAAAAAACAAGGG (5'RACE)	23	tgl	2.90622	0.984457		12.3027	1		0.539666	0.02		0.336805	0.002		tgl	transglutaminase (introduces cross-links in spore coat)	1.8 (Sporulation)	tgl	yuxF, yugV	no	no	tgl	BA4173	BC3963	tgl (BH3970)	no	no	no	no	no	tgl	1 TM (mid)
					BioOptimizer-no prediction	no
yugU (not included in final total)	yugU	downstream of tgl (convergent), antisense?					yugU	0.743809	0.111584		2.73527	0.994		0.535593	0.0245		0.373335	0.002		yugU			yugU				yugU									yugU
ydgBA-cotP	ydgB	GAACAATT	12	GCATAATGT	predicted sigK promoter	31	ydgB	6.75066	0.999881		10.617	0.999		0.639618	0.0705		0.378256	0.005		ydgB	unknown	5.1 (From B. subtilis)	ydgB	no	no	ydgA, ydzH	ydgB	no	no	no	no	no	no	no	no	ydgB	0 TM
		GAACA	15	GCATAATGTAC	BioOptimizer-prediction	31
	ydgA						ydgA	8.99921	0.999924		13.0017	0.996		0.860668	0.3735		0.398548	0.014		ydgA	unknown	5.1 (From B. subtilis)	ydgA	no	ydzH	ydgB	ydgA	no	no	no	no	no	no	no	no	ydgA	0 TM
	cotP (ydfT)	CTTCACTT	11	AAATATTGA	possible promoter-but probably operon with ydgBA	76	cotP (ydfT)	8.20651	0.999782		5.5847	0.999		0.480247	0.0395		0.35925	0.0015		cotP (ydfT)	spore coat protein (probable)	1.8 (Sporulation)	cotP (ydfT)	ydfT	no	yocM	cotP (ydfT)	no	no	no	no	no	no	no	no	cotP (ydfT)	0 TM
					BioOptimizer-no prediction	no
1.2. A. 2. b) not tested by 5'RACE-PCR
none
1.2. B. below cut-off in sigK+ vs. sigK- experiments but identified by overexpression of sK
none
1.2. C. not identified by overexpression of sK
1.2. C. 1. repression observed at both time points
none
1.2. C. 2. repression observed at second time point only
1.2. C. 2. a) promoter confirmed by 5'RACE-PCR
ykuD	ykuD	TAGCAGGA	12	CAATACTTA	TAAGTAAAAAAGGAGG (5'RACE)	25	ykuD	1.32761	0.882363		3.25087	0.998		0.579673	0.031		0.356934	0.005		ykuD	probable spore protein, cell wall binding motif (LysM domain), ErfK domain	1.8 (Sporulation)	ykuD	no	no	yqjB, lytF	ykuD	no [BA4372 (yqjB)]	no [BC4146 (yqjB)]	BH0811	no	CAC2416	no	no	no	ykuD	0 TM
					BioOptimizer-no prediction	no
1.2. C. 2. b) not tested by 5'RACE-PCR
yfhP	yfhP-P1	GTACACTA	11	CGATAATAT	proposed sigK promoter	133	yfhP-P1	1.07659	0.594474		1.89234	0.951		0.847382	0.2605		0.342769	0.0005		yfhP-P1	unknown, may act as a negative regulator for the transcription of yfhQ, fabL, sspE and yfhP	5.1 (From B. subtilis)	yfhP-P1	no	no	no	yfhP-P1	BA0521	BC0503	BH0929	OB0895	no	no	lmo1690	lin1798	yfhP-P1	4 TMs
	yfhP-P2	GCACAGTA	12	ACATTAAAT	proposed sigK promoter	121	yfhP-P2													yfhP-P2			yfhP-P2				yfhP-P2									yfhP-P2
					BioOptimizer-no prediction	no
1.3. Newly identified sK-controlled genes with predicted sK promoter:
1.3. A. also identified by overexpression of sK
1.3. A. 1. repressed at both time points
1.3. A. 1. a) promoter confirmed by 5'RACE-PCR
yhjR	yhjR	GCACATCT	11	ACATATACT	TTTACAGAAGCCCAA (5'RACE)	40	yhjR	2.64012	0.996769		19.7697	1		0.316247	0.002		0.156295	0		yhjR	unknown	5.1 (From B. subtilis)	yhjR	no	no	no	yhjR	BA3113	BC3081	BH1034	no	CAC3002	no	no	no	yhjR	0 TM
		GCACA	14	ACATATACTTT	BioOptimizer-confirmed by 5'RACE	38
yhjQ (not included in final total)	yhjQ	downstream of yhjR (read-through)					yhjQ	5.28963	0.99972		1.2	0.69		0.723457	0.113		0.648428	0.0415		yhjQ			yhjQ				yhjQ									yhjQ
yhjP (not included in final total)	yhjP	downstream of yhjQ (convergent), antisense?					yhjP	1.4497	0.925836		1	0.49		0.858209	0.295		0.40512	0.001		yhjP			yhjP				yhjP									yhjP
yitBA-yisZ	yitB	GAACCTTT	11	GAATAGTCT	GCCTATAACTCG (5'RACE)	53	yitB	9.88081	0.999943		40.8319	1		0.267142	0.002		0.111704	0		yitB	similar to phosphoadenosine phosphosulfate reductase	2.7 (Metabolism of sulfur)	yitB	no	cysH	no	yitB	BA1440	BC1421 (cysH/yitB)	cysH (BH1486)	cysH (OB1652)	CAC1200	no	no	no	yitB	0-1 (mid) TM
		GAACC	14	GAATAGTCTGC	BioOptimizer-confirmed by 5'RACE	51
	yitA						yitA	17.5736	0.999982		12.0504	1		0.300082	0.0005		0.133539	0		yitA	similar to sulfate adenylyltransferase	2.7 (Metabolism of sulfur)	yitA	no	sat	no	yitA	BA1441	BC1422	BH1487	OB1659	no	no	no	no	yitA	0 TM
	yisZ						yisZ	6.07601	0.999257		30.4089	0.997		0.180068	0.007		0.166097	0		yisZ	similar to adenylylsulfate kinase	2.7 (Metabolism of sulfur)	yisZ	no	cysC	no	yisZ	BA1442	BC1423	BH1489	OB1661	no [CAC0103 (cysC)]	no	no	no	yisZ	0-1 (mid) TM
yitCD	yitC	GAACCATT	12	GAATATGCT	TTTTAGCAAAATGGTTTT (5'RACE)	37	yitC	7.04905	0.999838		27.7971	0.998		0.27776	0.0015		0.128311	0		yitC	unknown (putative 2-phosphosulfolactate phosphatase)	5.2 (From other organisms)	yitC	no	no	no	yitC	no	no	no	no	CAC3233	CPE2556	no	no	yitC	0-1 (mid) TM
		GAACC	15	GAATATGCTTT	BioOptimizer-confirmed by 5'RACE	37
	yitD						yitD	3.1121	0.998046		11.9399	1		0.302369	0.0015		0.116597	0		yitD	unknown [putative (2R)-phospho-3-sulfolactate synthase (PSL synthase)]	5.2 (From other organisms)	yitD	no	no	no	yitD	no	no	no	no	no	no	no	no	yitD	0 TM
yitE (not included in final total)	yitE	downstream of yitCD (convergent), antisense?					yitE	1.48961	0.867262		2.1677	0.98		0.694367	0.079		0.498829	0.007		yitE			yitE				yitE									yitE
yndL	yndL	GAACAGCG	12	GTATATAAT	ATTGTGAAT(primer extension-Jessica Silvaggi)	101	yndL	4.89001	0.999549		23.3884	0.989		0.414925	0.0075		0.130899	0		yndL	unknown, similar to phage-related replication protein	4.4 (Phage-related functions)	yndL	no	yoqZ, ymaC, yjqB	no	yndL	no	no	no	OB3345	no	no	no	no	yndL	1 TM (Nter)
		GAACA	15	GTATATAATAT	BioOptimizer-confirmed by primer extension	99
yndM (not included in final total)	yndM	downstream of yndL (convergent), antisense?					yndM	2.18494	0.971266		1.5	0.9		0.676854	0.0775		0.391297	0.002		yndM			yndM				yndM									yndM
yngK	yngK	TCACCCTT	11	GAATACCGT	AATAGCGAATAG (5'RACE)	44	yngK	12.7275	0.999476		9.72747	1		0.357633	0.0025		0.18625	0		yngK	unknown, similar to fenI (fengycin synthesis, chloramphenicol resistance)	5.2 (From other organisms)	yngK	yotA	no	no	yngK	BA2460	fenI (BC2392)	no	OB2153	no	no	no	no	yngK	1 TM (Nter)
		TCACC	14	GAATACCGTAA	BioOptimizer-confirmed by 5'RACE	42
ynzE (not included in final total)	ynzE	terminator between yngK and ynzE (read-through?)					ynzE	3.13829	0.956332		1.45	0.87		0.614955	0.043		0.301766	0.0005		ynzE			ynzE				ynzE									ynzE
yoaN	yoaN (oxdD)	GCACAGCA	12	GCATAGGCT	GAAATAAAATCTTG	35	yoaN (oxdD)	8.86646	0.998113		22.5944	0.999		0.266262	0.0025		0.0798779	0		yoaN (oxdD)	oxalate decarboxylase	5.2 (From other organisms)	yoaN (oxdD)	oxdD	oxdC (yvrK)	no	yoaN (oxdD)	BA1742 (oxdC/yoaN)	no	no	no	no	no	no	no	yoaN (oxdD)	1 TM (mid)
		GCACA	15	GCATAGGCTGA	BioOptimizer-confirmed by 5'RACE	33
ytlABCD	ytlA	TCACACAT	11	TCATACGAT	ATGTAAAGCAAAAAAGG (5'RACE)	52	ytlA	14.5034	0.999973		17.1396	1		0.275357	0.001		0.121989	0		ytlA	unknown, similar to ABC transporter (substrate binding?)	6 (No similarity)	ytlA	no	no	no	ytlA	BA5036	BC4778	no	OB2316	CAC0620	CPE1487	no	no	ytlA	1 TM (Nter)
		TCACA	14	TCATACGATAT	BioOptimizer-confirmed by 5'RACE	50
		AAACA	15	CTATATGCTTT	BioOptimizer-prediction (inaccurate)
	ytlB						ytlB	13.5097	0.999931		14.5546	0.999		0.291373	0.001		0.150624	0.0005		ytlB	unknown, similar to ABC transporter (substrate binding?)	6 (No similarity)	ytlB	no	no	no	ytlB	BA5036	BC4778	no	OB2316	CAC0620	no	no	no	ytlB	0 TM
	ytlC						ytlC	11.8975	0.999099		14.8252	0.999		0.253822	0.002		0.118738	0		ytlC	similar to anion transport ABC transporter (ATP-binding protein)	1.2 (Transport/binding proteins and lipoproteins)	ytlC	no	ssuB, opuCA, opuBA, msmX, yurJ, opuAA, ytrE, glnQ		ytlC	BA5037	BC4779	no [BH1211 (ssuB)]	OB2317	CAC0619	no [CPE1270 (yurJ)]	no [opuCA]	no [opuCA]	ytlC	0-1 TM
	ytlD						ytlD	15.6886	0.99998		22.1309	1		0.241905	0.001		0.115024	0		ytlD	similar to ABC transporter (permease)	1.2 (Transport/binding proteins and lipoproteins)	ytlD	no	ssuC	yusB, opuBD,dppC	ytlD	BA5038	BC4779	no [BH2681 (ssuC)]	OB2318	CAC0618	no	no	no	ytlD	4 TM
1.3. A. 1. b) not tested by 5'RACE-PCR
ydfR	ydfR	TTGCTAT	12	TAATATATC	possible promoter (by visual inspection)	36	ydfR	4.61893	0.998903		2.40436	0.981		0.503955	0.033		0.242329	0.0045		ydfR	unknown	5.2 (From other organisms)	ydfR	no	no	ykjA, ydfS, yetF, yrbG	ydfR	no [BA5379 (ydfS)]	BC2531	BH1290/BH2720	no	CAC3372	no [CPE1348 (yrbG)]	no	no	ydfR	2 TMs
					BioOptimizer-no prediction	no
		downstream of cotP (same orientation)
ydfS	ydfS	GAACC	14	GTATAGATGGA	BioOptimizer-prediction	74	ydfS	5.02889	0.999735		7.09578	1		0.439675	0.013		0.266149	0.001		ydfS	unknown	5.2 (From other organisms)	ydfS	no	yetF, yrbG, ykjA	ydfR	ydfS	BA5379	BC5151	BH1970	OB1377	CAC1521	no	no	no	ydfS	2-3 TMs
		downstream of cotP (convergent), antisense?
yvdH	yvdH	CAGCAATG	12	TCATAAAGG	possible promoter (by visual inspection)	68	yvdH	1.95081	0.979747		2.25424	0.98		0.502519	0.045		0.490367	0.036		yvdH	similar to maltodextrin transport system permease	1.2 (Transport/binding proteins and lipoproteins)	yvdH	no	yvfL, yurN	araP, yesP, amyD, lplB, amyC, yteQ, yurM, lplC	yvdH	malC (BA4228yvfL/yvdH)	BC4012	BH2020 (yvfL/yvdH)/BH2925 (yvfL/yvdH)	OB2559 (yvfL/yvdH)	no	no	lmo2124	lin2229	yvdH	8-9 TMs
					not included in BioOptimizer list of sequences
1.3. A. 2. repression observed at only one of the two time points
1.3. A. 2. a) promoter confirmed by 5'RACE-PCR
yjcA	yjcA	TCATGAAG	13	GCATATATG	TGAAGGGATCAT (5' RACE)-looks more like a sigE promoter	33	yjcA	1.88973	0.95564		5.11682	0.993		0.659845	0.0865		0.4214	0.007		yjcA	unknown	5.1 (From B. subtilis)	yjcA	no	no	yngL	yjcA	BA1235	BC1219	BH2840	no	no	no	no	no	yjcA	3 TMs
		TCATGAAG	13	GCATATATG	TGAAGGGATCAT (mapped as a sigE promoter)	33
		TAACC	16	CCATACTCTAT	BioOptimizer-prediction (inaccurate)	no
		GGACA	16	GAATAGGGTTT	BioOptimizer-prediction (inaccurate)	no
yrkCD	yrkC	GCACACTC	11	GCATAGGAT	ACTATCACAAAAA (5'RACE)	36	yrkC	2.0644	0.991198		6.57658	1		0.592292	0.0545		0.303732	0.0015		yrkC	unknown	5.1 (From B. subtilis)	yrkC	no	no	no	yrkC	no	no	BH2720	OB0373	no	no	no	no	yrkC	0 TM
		GCACA	14	GCATAGGATAC	BioOptimizer-confirmed by 5'RACE	34
		GAACA	14	TAATATGAGTT	2nd BioOptimizer-prediction (inaccurate)	77
	yrkD						yrkD	2.03047	0.973663		3.4914	1		0.699086	0.1215		0.49469	0.0165		yrkD	unknown	5.1 (From B. subtilis)	yrkD	no	no	no	yrkD	BA0775	no	no	OB2653	no	no	no	no	yrkD	0 TM
ysnD	ysnD	GCACTTCT	12	GCATACATT	AATGATATCTTG (5'-RACE)	30	ysnD	3.74273	0.995512		5.29663	1		0.635688	0.066		0.528496	0.0215		ysnD	unknown	6 (No similarity)	ysnD	no	no	no	ysnD	no	no	no	no	no	no	no	no	ysnD	0-1 (mid) TM
		GCACT	15	GCATACATTAA	BioOptimizer-confirmed by 5'RACE	28
1.3. A. 2. b) not tested by 5'RACE-PCR
asnO	asnO (yisO)	TCAACTAT	12	GCATAAACT	predicted sigK promoter	130	asnO (yisO)	7.56959	0.999903		2.32274	0.985		0.618989	0.0555		0.427455	0.005		asnO (yisO)	asparagine synthetase (EC 6.3.5.4)	2.2 (Metabolism of amino acids and related molecules)	asnO (yisO)	yisO, yucB	asnB, asnH	purF	asnO (yisO)	asnO-1 (BA1157)/asnO-2 (BA1751)/asnO-3 (BA2251)	BC1152/BC1697/BC2204	BH1508	OB2608	CAC2243-CAC2249	no	no [asnB]	no [asnB]	asnO (yisO)	1 TM (mid)
		TCAAC	15	GCATAAACTTA	BioOptimizer-prediction	128
ycgG	ycgG	TCACCTGC	12	TAATATAGT	predicted sigK promoter	26	ycgG	3.8019	0.997631		2.40991	0.985		0.752146	0.1345		0.496184	0.0185		ycgG	unknown, sigE-controlled operon with ycgF	5.1 (From B. subtilis)	ycgG	no	yqcI	no	ycgG	no [BA3123 (yqcI)]	no [BC1604 (yqcI)]	no	no [OB3195 (yqcI)]	no	no	no	no	ycgG	1 TM (mid)
		TCACC	15	TAATATAGTTA	BioOptimizer-prediction	24
yjiA	yjiA	TAACTCCA	12	CCATTATGT	possible promoter (by visual inspection)	55	yjiA	2.20558	0.986659		2.13796	0.973		0.719191	0.1305		0.498532	0.0055		yjiA	unknown	6 (No similarity)	yjiA	no	no	no	yjiA	no	no	no	no	no	no	no	no	yjiA	1 TM (Nter)
					BioOptimizer-no prediction	no
ykoK	ykoK	AGTCAATC	11	CCATATACT	possible promoter (by visual inspection)	94	ykoK	2.01268	0.986958		2.49459	0.972		0.595648	0.044		0.469904	0.009		ykoK	similar to Mg2+ transporter	1.2 (Transport/binding proteins and lipoproteins)	ykoK	no	no	no	ykoK	no	no [impdh (guaC)]	ykoK	OB1224	CAC0684	CPE1240	no	no	ykoK	5 TMs
					BioOptimizer-no prediction	no
yqaN	yqaN	AATCCGTT	12	AAATAAAGC	possible promoter (by visual inspection)	121	yqaN	4.4825	0.998172		3.10456	0.993		0.633075	0.077		0.452796	0.0085		yqaN	similar to phage-related protein (within skin element)	6 (No similarity)	yqaN	no	no	no	yqaN	no	no	no	no	no	no	no	lin1248	yqaN	0 TM
yqaO (not included in final total)	yqaO	inside skin element			not included in BioOptimizer list of sequences		yqaO	0.945357	0.414956		2.22844	0.965		0.832286	0.2385		0.572162	0.0455		yqaO			yqaO				yqaO									yqaO
yqfQP	yqfQ	AAGCAAAT	12	GCATATTCT	possible promoter (by visual inspection)	32	yqfQ	2.01148	0.988921		bad spot on the array						bad spot on the array			yqfQ	unknown	6 (No similarity)	yqfQ	no	no	no	yqfQ	no	no	BH1384	OB1735	no	no	no	no	yqfQ	1 TM (mid)
		AAAGC	16	GCATATTCTAA	BioOptimizer-prediction	30
		GCACA	14	TCACATTATAC	BioOptimizer-prediction (unlikely)	119
	yqfP						yqfP	0.823322	0.196788		29.7852	0.989		0.661532	0.082		0.382336	0.001		yqfP	similar to penicillin tolerance (E. coli LytB)	4.2 (Detoxification)	yqfP	no	no	no	yqfP	lytB (BA4511)	no	BH1382	no	no [CAC1847 (ypfD)]	lytB (CPE1085)	lmo1451	no	yqfP	0 TM
yueE	yueE	GCGCATTT	12	GCATATACT	predicted sigK promoter	123	yueE	3.34437	0.997627		2.18776	0.97		0.643993	0.058		0.440487	0.0035		yueE	unknown	5.1 (From B. subtilis)	yueE	no	no	no	yueE	BA4807	BC4564	BH2866	OB0529	no	no	no	no	yueE	0 TM
		GCGCA	15	GCATATACTGA	BioOptimizer-prediction	123
yusM	yusM	GATCCTC	13	TCATTTTAT	possible promoter (by visual inspection)	62	yusM	2.56548	0.982873		2.00909	0.952		0.768858	0.15		0.437109	0.008		yusM	similar to proline dehydrogenase	2.2 (Metabolism of amino acids and related molecules)	yusM	no	ycgM	no	yusM	BA5253	BC5006 (yusM/ycgM)	BH1939 (ycgM/yusM)	OB1350 (ycgM/yusM)	no	no	no	no	yusM	0 TM
					BioOptimizer-no prediction	no
GENES IN SECTIONS 1.3.B) and 1.3.C) ARE NOT INCLUDED IN THE FINAL TOTAL OF SIGK-CONTROLLED GENES
1.3. B. below cut-off in sigK+ vs. sigK- experiments but identified by overexpression of sK
1.3. B. 1. repressed at both time points
ybfAB	ybfA	TATCGTTG	11	ATATGTGAT	possible promoter (by visual inspection)	42	ybfA	2.78418	0.997807		1.75	0.92		0.592198	0.043		0.277198	0.004		ybfA			ybfA				ybfA									ybfA
					BioOptimizer-no prediction	no
	ybfB						ybfB	3.21563	0.998468		0.921075	0.383		0.956575	0.431		0.620961	0.0275		ybfB			ybfB				ybfB									ybfB
1.3. B. 2. repressed at only one of the two time points
none
1.3. C. not identified by overexpression of sK , but down-regulated in the presence of GerE
1.3. C. 1. repressed at both time points
1.3.C.1. a) ratio in sigK+ vs. sigK- experiment is high (>3)
mntABCD	mntA (ytgA)	CACATGT	14	CATAAGAT	possible promoter (by visual inspection)	38	mntA (ytgA)	0.204208	0.000517922		3.43558	0.99		0.53504	0.0315		0.539344	0.031		mntA (ytgA)			mntA (ytgA)				mntA (ytgA)									mntA (ytgA)
	mntB (ytgB)						mntB (ytgB)	0.171201	0.00017592		3.79315	0.995		0.565554	0.027		0.44695	0.0025		mntB (ytgB)			mntB (ytgB)				mntB (ytgB)									mntB (ytgB)
	mntC (ytgC)						mntC (ytgC)	0.350239	0.00211678		3.14775	0.994		0.575865	0.032		0.463859	0.0135		mntC (ytgC)			mntC (ytgC)				mntC (ytgC)									mntC (ytgC)
	mntD (ytgD)						mntD (ytgD)	0.583022	0.0419741		1.8578	0.969		0.571543	0.0355		0.44629	0.0025		mntD (ytgD)			mntD (ytgD)				mntD (ytgD)									mntD (ytgD)
murC	murC	GTCGCAA	14	CATATACT	possible promoter (by visual inspection)	34	murC	1.00653	0.512061		3.28852	0.995		0.535647	0.019		0.356654	0.002		murC			murC				murC									murC
pbpA	pbpA	GACCCTT	13	GATAATTT	possible promoter (by visual inspection)	110	pbpA	1.55911	0.955834		3.16228	0.983		0.38869	0.005		0.259161	0.0005		pbpA			pbpA				pbpA									pbpA
yhfA-yhaA	yhfA	GCACCTTC	11	GAATAATCT	possible promoter (by visual inspection)	20	yhfA	1.61193	0.962704		10.1625	1		0.24542	0		0.137054	0.0005		yhfA			yhfA				yhfA									yhfA
	yhaA						yhaA	0.416673	0.05333		2.28034	0.971		0.404567	0.009		0.277631	0		yhaA			yhaA				yhaA									yhaA
yisJI	yisJ	TTTCAGGA	12	ACATATCAT	possible promoter (by visual inspection)	31	yisJ	0.957303	0.422446		14.6555	1		0.481444	0.01		0.330623	0.0165		yisJ			yisJ				yisJ									yisJ
	yisI						yisI	0.501579	0.0773234		2.66073	0.97		0.585576	0.0375		0.323948	0.0125		yisI			yisI				yisI									yisI
yjqC	yjqC	GCACGGTT	11	TCATACGCT	possible promoter (by visual inspection)	33	yjqC	1.57802	0.957789		6.9024	0.997		0.527316	0.0145		0.376007	0.0005		yjqC			yjqC				yjqC									yjqC
ypbGH	ypbG	GCACAAAT	11	CTATATTTT	preferred predicted promoter	97	ypbG	1.27507	0.829165		2.54097	0.98		0.577915	0.028		0.34441	0.0035		ypbG			ypbG				ypbG									ypbG
		GCACA	14	CTATATTTTGA	BioOptimizer-prediction	95
		GAAGG	16	TCATATGATGA	BioOptimizer-prediction	128
	ypbH						ypbH	1.71611	0.975306		5.44503	0.995		0.71927	0.1205		0.461342	0.0045		ypbH			ypbH				ypbH									ypbH
yrzA	yrzA	AACAGTT	12	CATATTCT	possible promoter (by visual inspection)	109	yrzA	0.634951	0.0703672		2.99916	0.994		0.307597	0.0175		0.439209	0.0095		yrzA			yrzA				yrzA									yrzA
ytaFG	ytaF	AAACACGG	13	CCATATATA	possible promoter (by visual inspection)	73	ytaF	1.06322	0.60845		7.92501	0.993		0.525617	0.0225		0.322328	0.001		ytaF			ytaF				ytaF									ytaF
	ytaG						ytaG	1.6017	0.961322		4.62381	0.995		0.452669	0.0065		0.285178	0.0005		ytaG			ytaG				ytaG									ytaG
ytwI-citZ	ytwI	CACGCTG	12	AATACATT	possible promoter (by visual inspection)	22	ytwI	1.43323	0.926128		4.0738	0.996		0.499224	0.0235		0.31181	0.001		ytwI			ytwI				ytwI									ytwI
1.3.C.1. b) ratio in sigK+ vs. sigK- experiment is low (<3)
gcvT (yqhI)-gcvPAB (yqhJK)	gcvT (yqhI)	GACAGAG	13	CATGAGGT	possible promoter (by visual inspection)	60	gcvT (yqhI)	0.704726	0.0761028		1.6	0.94		0.401663	0.0065		0.252037	0.0035		gcvT (yqhI)			gcvT (yqhI)				gcvT (yqhI)									gcvT (yqhI)
	gcvPA (yqhJ)						gcvPA (yqhJ)	1.12749	0.704396		1.77011	0.961		0.405856	0.0075		0.26232	0		gcvPA (yqhJ)			gcvPA (yqhJ)				gcvPA (yqhJ)									gcvPA (yqhJ)
	gcvPB (yqhK)						gcvPB (yqhK)	1.21825	0.753754		1.7	0.94		0.45129	0.014		0.293828	0.001		gcvPB (yqhK)			gcvPB (yqhK)				gcvPB (yqhK)									gcvPB (yqhK)
yhgD	yhgD	AGCAGGT	13	CATATGTA	possible promoter (by visual inspection)	45	yhgD	0.764126	0.125651		2.05589	0.966		0.585243	0.0275		0.437243	0.004		yhgD			yhgD				yhgD									yhgD
yjaZ	yjaZ	AATCTTTA	11	TCATAATCA	predicted promoter (overlap with predicted sE promoter)	72	yjaZ	1.67542	0.972827		2.09411	0.971		0.57338	0.0215		0.379486	0.0025		yjaZ			yjaZ				yjaZ									yjaZ
		TAGCC	14	GCATAGGATTA	BioOptimizer-prediction	17
ykoY	ykoY	TGACAAAT	11	GCATATTAT	predicted promoter	51	ykoY	0.521148	0.192253		2.24905	0.972		0.493987	0.0185		0.287995	0.001		ykoY			ykoY				ykoY									ykoY
		TGACA	14	GCATATTATTG	BioOptimizer-prediction	49
ypbB	ypbB	ATCACAT	13	CATAACAT	possible promoter (by visual inspection)	101	ypbB	0.677571	0.0636763		2.38781	0.99		0.521738	0.023		0.285954	0.0005		ypbB			ypbB				ypbB									ypbB
ysmA	ysmA	upstream of gerE, no promoter found					ysmA	1.13288	0.704999		2.23872	0.977		0.202467	0.0005		0.184369	0		ysmA			ysmA				ysmA									ysmA
ytvB	ytvB	AGCTTAC	14	CATATAAT	possible promoter (by visual inspection)	120	ytvB	1.06611	0.61348		1.88799	0.958		0.5934	0.033		0.359307	0.0025		ytvB			ytvB				ytvB									ytvB
yxzF	yxzF	AACAGGT	14	CATGTTTA	possible promoter (by visual inspection)	20	yxzF	1.15094	0.73129		1.9	0.898		0.462178	0.0495		0.0682768	0.001		yxzF			yxzF				yxzF									yxzF
yyaK	yyaK	TTCATAG	13	AATATATA	possible promoter (by visual inspection)	36	yyaK	1.2639	0.781134		2.55859	0.982		0.58369	0.0535		0.366319	0.0035		yyaK			yyaK				yyaK									yyaK
1.3. C. 2. repressed at only one of the two time points
1.3.C. 2. a) ratio in sigK+ vs. sigK- experiment is high (>3)
fer	fer	no promoter found, divergent from ypbB					fer	0.596799	0.119261		3.75837	0.973		0.800994	0.231		0.359527	0.0005		fer			fer				fer									fer
ycdH	ycdH	no promoter found					ycdH	1.02752	0.545099		3.8	0.94		0.645278	0.05		0.427523	0.0035		ycdH			ycdH				ycdH									ycdH
ydcI	ydcI	no promoter found					ydcI	0.975421	0.457737		2.12814	0.981		0.689642	0.0915		0.54023	0.0115		ydcI			ydcI				ydcI									ydcI
yjnA	yjnA	ACACTCAT	12	GAATAGAGA	possible promoter (by visual inspection)	121	yjnA	1.034	0.553008		6.39735	0.999		0.652363	0.0715		0.497757	0.037		yjnA			yjnA				yjnA									yjnA
ytlR	ytlR	AACGATT	13	CATAACAT	possible promoter (by visual inspection)	15	ytlR	1.43467	0.912462		3.33426	0.99		0.67313	0.0995		0.47573	0.022		ytlR			ytlR				ytlR									ytlR
yraK	yraK	TATCACCT	11	CAATAAAAA	possible promoter (by visual inspection)	156	yraK	1.07036	0.617473		14.7571	0.962		0.774388	0.1695		0.502785	0.025		yraK			yraK				yraK									yraK
ywkF	ywkF	no promoter found					ywkF	0.948638	0.403997		3.01301	0.99		0.605777	0.0515		0.346681	0.0015		ywkF			ywkF				ywkF									ywkF
1.3.C.2. b) ratio in sigK+ vs. sigK- experiment is low (<3)
lytD	lytD	no promoter found					lytD	1.13587	0.692619		2.81838	0.987		0.679121	0.077		0.466387	0.0065		lytD			lytD				lytD									lytD
prs	prs	GACGATT	14	CATAAAAA	possible promoter (by visual inspection)	26	prs	0.675279	0.0659427		1.84927	0.963		0.654368	0.063		0.297795	0		prs			prs				prs									prs
tagO	tagO	CTCTATA	13	CATTTAAT	possible promoter (by visual inspection)	18	tagO	0.570037	0.0881826		2.79898	0.987		0.744188	0.1325		0.57299	0.0155		tagO			tagO				tagO									tagO
uvrC	uvrC	no promoter found					uvrC	1.58584	0.959863		2.47742	0.974		1.12582	0.606		0.465192	0.0095		uvrC			uvrC				uvrC									uvrC
yddN	yddN	no promoter found					yddN	1.1138	0.689677		2.00447	0.962		0.731383	0.117		0.488712	0.0215		yddN			yddN				yddN									yddN
yhaL	yhaL	CACATAA	15	CATATGGT	possible promoter (by visual inspection)	36	yhaL	0.47139	0.0136491		1.84927	0.965		0.805751	0.215		0.466476	0.0125		yhaL			yhaL				yhaL									yhaL
ykoN	ykoN	CTCCTCA	12	CATATTTT	possible promoter (by visual inspection)	15	ykoN	1.38587	0.657399		2.63633	0.989		2.54382	0.804		0.463458	0.004		ykoN			ykoN				ykoN									ykoN
ykoP	ykoP	CTCCTAA	14	TATATTTT	possible promoter (by visual inspection)	55	ykoP	1.37466	0.780356		2.48886	0.983		0.737791	0.1225		0.53648	0.015		ykoP			ykoP				ykoP									ykoP
yprB	yprB	no promoter found, upstream of cotD					yprB	0.695141	0.0826436		1.88365	0.965		0.625955	0.049		0.349908	0.007		yprB			yprB				yprB									yprB
yrkRS	yrkR	CACCAAG	12	AATAAAAA	downstream of spoIIIC	28	yrkR	1.20696	0.734147		2.40436	0.988		0.845572	0.308		0.454979	0.018		yrkR			yrkR				yrkR									yrkR
	yrkS				downstream of spoIIIC		yrkS	0.820115	0.221706		1.63505	0.9255		0.805222	0.19		0.601185	0.0635		yrkS			yrkS				yrkS									yrkS
yugK	yugK	no promoter found					yugK	0.737218	0.18122		2.07491	0.969		0.718814	0.106		0.458051	0.01		yugK			yugK				yugK									yugK
yuiBC	yuiB	no promoter found					yuiB	1.23788	0.745982		2.24905	0.959		0.760312	0.17		0.491588	0.0225		yuiB			yuiB				yuiB									yuiB
	yuiC						yuiC	0.862691	0.255112		1.7342	0.9415		0.577103	0.0505		0.427475	0.017		yuiC			yuiC				yuiC									yuiC
ywnC	ywnC	CACTTGT	14	CATACATA	possible promoter (by visual inspection)	139	ywnC	0.430967	0.00636709		2.47172	0.987		NA	NA		0.357213	0.006		ywnC			ywnC				ywnC									ywnC
yyaJ	yyaJ	no promoter found, divergent from yyaK					yyaJ	0.879027	0.307801		2.70396	0.986		0.671301	0.082		0.408329	0.008		yyaJ			yyaJ				yyaJ									yyaJ
					BioOptimizer-no prediction	no
yyaTS	yyaT	no promoter found					yyaT	NA	NA		NA	NA		0.965789	0.4715		0.434276	0.0235		yyaT			yyaT				yyaT									yyaT
yyaS	yyaS	GTACGGAT	14	TCGTAAGCG	possible promoter (by visual inspection)	169	yyaS	1.95016	0.926543		2.83792	0.983		0.795897	0.2475		0.501626	0.054		yyaS			yyaS				yyaS									yyaS
					BioOptimizer-no prediction	no
2. sK-CONTROLLED GENES ACTIVATED BY GerE:
2.1. Previously identified sK-controlled genes (with mapped transcription start site):
2.1. A. Also identified by overexpression of sK
cgeAB	cgeA	ATACCAAA	12	GAATATGAA	TAACGTGAGT (mapped sigK promoter)	36	cgeA	1.83639	0.981164		2.32809	0.98		7.28936	1		17.7615	1		cgeA	maturation of the outermost layer of the spore	1.8 (Sporulation)	cgeA	cgeAA	no	no	cgeA	no	no	no	no	no	no	no	no	cgeA	0-1 TM (mid)
					BioOptimizer-no prediction	no
	cgeB						cgeB	12.4711	0.999857		1.67494	0.937		27.0119	1		31.7663	1		cgeB	maturation of the outermost layer of the spore	1.8 (Sporulation)	cgeB	cgeAB	no	ykvP	cgeB	no	no	cgeB (BH2839)	no	CAC2177	no	no	no	cgeB	0 TM
cotB-ywrJ	cotB	CAACAAAT	11	GTATATATG	CAGTATGT (mapped sigK promoter)	44	cotB	1.90988	0.976741		11.0662	0.999		3.28658	1		3.36421	0.999		cotB	spore coat protein (outer)	1.8 (Sporulation)	cotB	no	no	ywrJ	cotB	BA0357	BC0389/BC0390	no	no	no	no [CPE0112 (ypuA)]	no	no	cotB	0 TM
					BioOptimizer-no prediction	no
	ywrJ						ywrJ	4.39259	0.998588		5.08159	0.997		3.24616	0.996		2.73002	0.997		ywrJ	unknown	6 (No similarity)	ywrJ	no	no	cotB	ywrJ	BA0357	BC0391	no	no	no	no	no	no	ywrJ	1-2 TMs
ywrK (not included in final total)	ywrK	downstream of ywrJ (convergent), antisense?					ywrK	1.02698	0.538144		2.39332	0.992		11.4457	0.9995		15.8199	1		ywrK			ywrK				ywrK									ywrK
cotG	cotG	ATACACTT	11	GCGTACTAT	GAGGGTAG (mapped sigK promoter)	53	cotG	2.28693	0.995038		5.50808	0.998		8.74854	1		12.123	1		cotG	spore coat protein (required for the incorporation of CotB into the coat)	1.8 (Sporulation)	cotG	no	no	no	cotG	no	no [BC4731(gerAA)]	no	no	no	no	no	no	cotG	0 TM
					BioOptimizer-no prediction	no
cotSA-cotS-ytxO	cotSA (ytxN)	GCACAAGT	12	CCGTATCAT	GATTCTAACT (mapped sigK promoter)	42	cotSA (ytxN)	0.934149	0.382032		1.52203	0.9		7.85153	1		7.09133	0.9995		cotSA (ytxN)	spore coat protein (similarity to glycosyl transferase), assembly into the coat dependent on CotS	1.8 (Sporulation)	cotSA (ytxN)	ytxN, ytbA	ytcC	yveN, yqgM, ypjH, tuaC	cotSA (ytxN)	BA5012	BC4756	BH2305	OB2890	no [CAC1053 (yqgM/ypjH)]	CPE0498	no	no [lin2700 (ypjH)]	cotSA (ytxN)	0 TM
		GCACA	14	CCGTATCATGA	BioOptimizer prediction-correct	40
	cotS						cotS	1.43875	0.92818		4.68813	0.994		9.45913	1		7.29847	1		cotS	spore coat protein (inner), located in the inner coat layer; CotE required for the assembly of CotS in the coat	1.8 (Sporulation)	cotS	no	cotI (ytaA)	yutH	cotS	cotS (BA 5188)	no [BC4954 (yutH)]	no [BH2306 (cotI)]	no	CAC2906 (cotI/cotS)	CPE2218 (cotS/cotI)	no	no	cotS	1-2 TMs
	ytxO						ytxO	2.38324	0.989292		12.9718	0.996		5.64347	1		5.05944	1		ytxO	unknown	6 (No similarity)	ytxO	ytbB	no	no	ytxO	no	no	no	no	no	no	no	no	ytxO	0 TM
cotX	cotX	AGTCAAAA	12	TCATTTAAT	AACAGTAA (mapped sigK promoter)	27	cotX	6.46241	0.999836		6.223	0.998		2.03729	0.9895		2.19765	0.9955		cotX	spore coat protein (insoluble fraction)	1.8 (Sporulation)	cotX	no	no	no	cotX	no	BC2874/BC2872	cotX	OB0575/OB0574	no	no	no	no	cotX	1-2 TMs
		TAACA	16	AAATAGGGTTC	BioOptimizer-inaccurate	no
cotYZ	cotY	ACACCAAG	12	ACATATGTT	GTTAAGGAC (mapped sigK promoter)	46	cotY	8.95182	0.999935		5.86138	0.998		2.36215	0.9925		1.77947	0.981		cotY	spore coat protein (insoluble fraction)	1.8 (Sporulation)	cotY	no	cotZ	no	cotY	cotZ-1 (BA1234)/cotZ-2 (BA1238)	BC1218/BC1222	no	no [OB1226 (cotZ)]	no	no	no	no	cotY	0 TM
		ACACC	15	ACATATGTTGT	BioOptimizer prediction-correct	44
	cotZ						cotZ	8.77693	0.999923		17.1396	0.99		2.83089	0.993		1.80852	0.9795		cotZ	spore coat protein (insoluble fraction)	1.8 (Sporulation)	cotZ	no	cotY	no	cotZ	cotZ-1 (BA1234)/cotZ-2 (BA1238)	BC1218/BC1222	no	OB1226	no	no	no	no	cotZ	0 TM
2.1. B. below cut-off in sigK+ vs. sigK- experiments but identified by overexpression of sK
cwlC	cwlC	CAAGCAGA	12	TCATATCCT	GTAATGAGG (mapped sigK promoter)	18	cwlC	6.87159	0.999824		0.976992	0.46		2.24053	0.9775		21.9575	1		cwlC	N-acetylmuramoyl-L-alanine amidase (sporulation-specific mother cell wall), (EC 3.5.1.28)	1.1 (Cell wall)	cwlC	no	yqiI, lytC, yrvJ	cwlD	cwlC	no	BC2207	cwlC (BH1294)	OB0220	no [CAC3092 (cwlD)]	no [CPE2367 (cwlD)]	lmo0129	lin0176	cwlC	0-1 TM (mid)
		GCACA	16	GTATCTGTTGT	BioOptimizer-inaccurate	no
cwlH (yqeE)	cwlH (yqeE)	TGTCCATC	12	GCATTCTTA	TTAATAGG (mapped sigK promoter)	19	cwlH (yqeE)	2.51635	0.984888		0.799941	0.25		1.32113	0.8375		3.07045	0.9995		cwlH (yqeE)	N-acetylmuramoyl-L-alanine amidase (sporulation-specific mother cell wall), (EC 3.5.1.28)	1.1 (Cell wall)	cwlH (yqeE)	yqeE	xlyA, cwlA, xlyB	blyA	cwlH (yqeE)	BA0870	BC0888	no [BH3671 (lytE)]	no	no [CAC0686 (sleB)]	no [CPE0606 (yrvJ)]	no	no [lin1700 (cwlA)]	cwlH (yqeE)	0 TM
					BioOptimizer-no prediction	no
sspG-yurS	sspG	AATCTCTT	12	GAATATCCT	GTCACTATC (mapped sigK promoter)	29	sspG	not on the array			not on the array			not on the array			not on the array			sspG	small acid-soluble spore protein (minor)	1.8 (Sporulation)	sspG	no	no	no	sspG	no	no	no	no	no	no	no	no	sspG	0 TM
					BioOptimizer-no prediction	no
	yurS						yurS	3.1178	0.992995		0.878359	0.34		2.61498	0.999		2.49145	0.998		yurS	unknown	6 (No similarity)	yurS	no	no	no	yurS	no	no	no	no	no	no	no	no	yurS	1 TM (mid)
2.1. C. not identified by overexpression of sK
cotD	cotD	GAACATGT	12	TCATAACTT	AGTATTGTAA (mapped sigK promoter)	38	cotD	1.36111	0.894792		3.47536	0.994		6.10953	0.9995		4.41481	1		cotD	spore coat protein (inner)	1.8 (Sporulation)	cotD	no	no	no	cotD	BA1581	BC1560	cotD (BH1767)	OB1024	no	no	no	no	cotD	0 TM
					not included in BioOptimizer list of sequences	no
ypsA (not included in final total)	ypsA	terminator between cotD and ypsA					ypsA	0.632161	0.0430474		1.1	0.61		1.84802	0.9715		2.41645	0.995		ypsA			ypsA				ypsA									ypsA
2.1. D. identified neither by overexpression of sK nor in sigK+ vs. sigK- experiment
cgeCDE	cgeC	ATACCATA	12	ACATATTGT	GAACAGAGA (mapped sigK promoter)	33	cgeC	0.948121	0.459043		1.21495	0.751		10.4805	1		12.7155	0.9995		cgeC	maturation of the outermost layer of the spore	1.8 (Sporulation)	cgeC	cgeBA	no	no	cgeC	no	no	no	no	no	no	no	no	cgeC	0 TM
					not included in BioOptimizer list of sequences	no
	cgeD						cgeD	0.977079	0.45941		0.956814	0.44		5.43942	0.999		9.04461	0.9995		cgeD	maturation of the outermost layer of the spore (glycosyl transferase), similar to spsA and glycosyl transferases	1.8 (Sporulation)	cgeD	cgeBB	spsA	tuaG, yveO, ggaB, ywdF, yveT	cgeD	no	no [BC1943 (tuaG)]	cgeD (BH3373)	no [OB2925 (tuaG)]	CAC2346	no	no	no	cgeD	0 TM
	cgeE						cgeE	0.978735	0.464441		0.78374	0.2		6.06427	0.999		7.40266	1		cgeE	maturation of the outermost layer of the spore (acetyl transferase)	1.8 (Sporulation)	cgeE	cgeBC	no	yybD, yyaT	cgeE	no	no	no	no	no	no	no	no	cgeE	0 TM
cotC	cotC	CAAGCCGC	12	CCGTATAAT	AAGCGTA (mapped sigK promoter)	"+126"	cotC	1.14108	0.625441		NA	NA		NA	NA		NA	NA		cotC	spore coat protein (outer), not expressed in resuspension medium	1.8 (Sporulation)	cotC	no	no	no	cotC	no	no	no	no	no	no	no	no	cotC	1 TM (Nter)
					not included in BioOptimizer list of sequences	no
yobW	yobW	CTACTATT	13	GCATACACT	TCTCAACGGA (mapped sigK promoter)	24	yobW	0.373916	0.0349784		0.93855	0.42		2.99179	0.9975		5.92398	1		yobW	unknown; sporulation membrane protein	1.8 (Sporulation)	yobW	csk22	no	no	yobW	no	no	no	no	no	no	no	no	yobW	4-5 TMs
					not included in BioOptimizer list of sequences	no
2.2. Previously reported sK-controlled genes (but transcription start site has not been mapped):
2.2. A. also identified by overexpression of sK
2.2. A. 1. promoter confirmed by 5'RACE-PCR
spsABCDEFGIJKL	spsA	GCGCAACT	12	ACATAAGAT	AACGATAGTTT (5'RACE)	44	spsA	5.70501	0.999727		10.9901	1		1.5177	0.936		1.63479	0.9715		spsA	spore coat polysaccharide synthesis	1.8 (Sporulation)	spsA	ipa-63d	cgeD	yveO, tuaG, yveR, yveT, ywdF, yfnE	spsA	no	no [BC1941 (tuaG)]	spsA (BH3367)	no [OB2925 (tuaG)]	no [CAC2174 (yveO)]	no [CPE0484 (yveT)]	no [lmo1090 (yveT)]	no	spsA	0 TM
		GCGCA	15	ACATAAGATAA	BioOptimizer-confirmed by 5'RACE	42
		AAACA	14	GCATATTGGTT	2nd BioOptimizer-prediction (inaccurate)	83
	spsB						spsB	6.07823	0.999798		11.5611	1		1.63163	0.963		1.98121	0.9865		spsB	spore coat polysaccharide synthesis	1.8 (Sporulation)	spsB	ipa-64d	no	no	spsB	no	no	no	no	no	no	no	no	spsB	0-1 TM (mid)
	spsC						spsC	8.22916	0.999878		12.0781	1		1.78119	0.9645		2.20558	0.9955		spsC	spore coat polysaccharide synthesis	1.8 (Sporulation)	spsC	ipa-65d	yhjL, yvfE	speA, patA	spsC	no	BC5273	no	no	CAC2260	no	no	no	spsC	1 TM (mid)
	spsD						spsD	6.75066	0.999881		9.7499	0.999		1.72409	0.9755		2.03683	0.9855		spsD	spore coat polysaccharide synthesis	1.8 (Sporulation)	spsD	ipa-66d	no	yhfO	spsD	no	no	no	no	no	no	no	no	spsD	0 TM
	spsE						spsE	10.6786	0.999905		11.2202	1		1.80366	0.97		2.21644	0.994		spsE	spore coat polysaccharide synthesis	1.8 (Sporulation)	spsE	ipa-67d	no	no	spsE	no	no	no	no	CAC2187	no	no	no	spsE	1 TM (mid)
	spsF						spsF	9.11647	0.999928		11.6681	1		1.8921	0.988		2.03396	0.9945		spsF	spore coat polysaccharide synthesis	1.8 (Sporulation)	spsF	ipa-68d	no	no	spsF	no	no	no	no	CAC2190	no	no	no	spsF	0-1 TM (mid)
	spsG						spsG	10.2155	0.999946		11.8304	1		1.84122	0.9845		2.31831	0.997		spsG	spore coat polysaccharide synthesis	1.8 (Sporulation)	spsG	ipa-69d, spsH	no	no	spsG	no	no	no	no	CAC2186	no	no	no	spsG	1 TM (mid)
	spsI						spsI	7.47137	0.999903		9.93116	0.996		1.96277	0.99		2.29084	0.9965		spsI	spore coat polysaccharide synthesis	1.8 (Sporulation)	spsI	ipa-71d	ytdA, gtaB	yngB, glgC, yfnH	spsI	BA1228	BC1212	spsI (BH3363)	OB1129	CAC2333	rfbA (CPE0616)	lmo1081	no	spsI	0 TM
	spsJ						spsJ	6.80654	0.999834		3.2961	0.992		1.69838	0.9625		2.00222	0.9865		spsJ	spore coat polysaccharide synthesis	1.8 (Sporulation)	spsJ	ipa-72d	yfnG, ytcB, galE	yodU, yveM, pksJ	spsJ	rfbB(BA1230)	BC1214	spsJ (BH3364)	OB2420	CAC2332	rfbB (CPE0619)	lmo1083	no	spsJ	1 TM (Nter)
	spsK						spsK	6.5573	0.999858		2.71644	0.984		1.60054	0.9535		1.60458	0.965		spsK	spore coat polysaccharide synthesis	1.8 (Sporulation)	spsK	ipa-73d	no	galE, yveM	spsK	rfbD(BA1231)	BC1215	rbfD (BH3365)/rbfC (BH3366)	OB1127	CAC2315	rbfD (CPE0618)	lmo1084	no	spsK	0 TM
	spsL (spsK)						spsL (spsK)	6.5573	0.999858		2.71644	0.984		1.60054	0.9535		1.60458	0.965		spsL (spsK)	spore coat polysaccharide synthesis	1.8 (Sporulation)	spsL (spsK)	ipa-73d	no	galE, yveM	spsL (spsK)	rfbD(BA1231)	BA1215	rbfD (BH3365)/rbfC (BH3366)	OB1127	CAC2315	rbfD (CPE0618)	lmo1084	no	spsL (spsK)	0 TM
yxeE	yxeE	GTGCCACT	12	ACATAAGTT	ATAAGGAATTTCA (5'RACE)	32	yxeE	3.39532	0.998819		6.36796	1		4.72597	1		4.09756	0.9995		yxeE	unknown, probable spore coat protein, isolated from yabGD spores	6 (No similarity)	yxeE	no	no	no	yxeE	BA3589	BC3534	no	no	no	no	no	no	yxeE	0 TM
					BioOptimizer-no prediction	no
2.2. A. 2. not tested by 5'RACE-PCR
none
2.2. B. below cut-off in sigK+ vs. sigK- experiments but identified by overexpression of sK
ykvPQ	ykvP	GTACCGCG	12	ACATACCAA	possible promoter (by visual inspection)	46	ykvP	16.901	0.999045		1.37594	0.84		16.3379	1		20.4434	1		ykvP	unknown, putative spore protein, cell wall binding motif	5.1 (From B. subtilis)	ykvP	no	no	cgeB, lytF	ykvP	no	no	no (cgeB)	no	no [CAC2177 (cgeB)]	no	no	no	ykvP	0 TM
					BioOptimizer-no prediction	no
	ykvQ						ykvQ	2.52767	0.990969		1.5183	0.91		2.90524	0.9965		6.43162	1		ykvQ	similar to chitinase	2.1.1 (Specific pathways)	ykvQ	no	no	yvbX, ydhD, yaaH	ykvQ	no	no [BC3607 (yaaH)]	no [BH2292 (yaaH)]	no [OB0024 (yaaH)]	no [CAC2747 (yaaH)]	no	no	no	ykvQ	0 TM
2.2. C. not identified by overexpression of sK
none
2.2. D. identified neither by overexpression of sK nor in sigK+ vs. sigK-
none
2.3. Newly identified sK-controlled genes:
2.3. A. also identified by overexpression of sK
2.3. A. 1. promoter confirmed by 5'RACE-PCR
yfnHGF	yfnH	TCACCAAG	12	TCATATCAT	TACAGTAGATTTT (5'RACE)	115	yfnH	11.2793	0.999962		1.29454	0.76		12.9689	0.9995		16.4852	1		yfnH	similar to glucose-1-phosphate cytidylyltransferase	2.1.1 (Specific pathways)	yfnH	no	no	glgC, spsI, gtaB, yngB, ytdA	yfnH	no	BC3514	mpg (spsI/yfnH)	no	no [CAC2981 (glgC)]	no	no	no	yfnH	0 TM
		TCACC	15	TCATATCATTA	BioOptimizer-confirmed by 5'RACE	113
	yfnG						yfnG	14.1114	0.99997		1.95884	0.959		16.5956	1		22.1152	1		yfnG	similar to CDP-glucose 4,6-dehydratase	1.1 (Cell wall)	yfnG	no	spsJ, ytcB	galE	yfnG	no	BC3359	no [BH3649 (galE)]	no [OB2082 (ytcB)]	no [CAC2334 (galE)]	no [rfbB (spsJ)]	no [lmo1083 (spsI)]	no	yfnG	0 TM
	yfnF						yfnF	14.4438	0.999974		2.13796	0.971		9.11202	1		11.0229	1		yfnF	unknown	5.1 (From B. subtilis)	yfnF	no	yfnD	no	yfnF	no	BC3515	no	no	no	no	no	no	yfnF	0 TM
ylbDE	ylbD	GAACACAA	12	CGATACATT	GTAGTAGGTACC (5' RACE)	35	ylbD	2.2399	0.990325		5.50808	0.986		2.25122	0.994		1.28745	0.8505		ylbD	unknown	5.1 (From B. subtilis)	ylbD	no	no	no	ylbD	BA4146	BC3936	BH2601	OB1446	no	no	no	no	ylbD	0 TM
					BioOptimizer-no prediction	no
	ylbE						ylbE	1.93494	0.935359		4.52898	0.991		2.37258	0.988		1.29852	0.826		ylbE	unknown	5.1 (From B. subtilis)	ylbE	no	no	no	ylbE	BA4145	BC3935	BH2600	OB1447	no	no	no	no	ylbE	0 TM
yodHI	yodH	AAACCTAT	11	ACATATGAT	AAGGAAAAAGGAGGAT (5'RACE)	21	yodH	3.62422	0.998522		7.90679	0.998		1.67689	0.971		1.82484	0.9595		yodH	unknown, similar to methyltransferase	5.1 (From B. subtilis)	yodH	no	no	no	yodH	BA3641	BC3583	BH0821	no [OB0353 (ycqJ)]	no	no	no	no	yodH	1 TM (Nter)
		AAACC	14	ACATATGATAA	BioOptimizer-confirmed by 5'RACE	19
	yodI						yodI	1.18427	0.777229		5.8479	0.999		2.16986	0.994		2.84466	0.999		yodI	unknown (SAM binding motif)	6 (No similarity)	yodI	no	no	no	yodI	BA3640	BC3582	no	no	no	no	no	no	yodI	1 TM (Cter)
yodJ (not included in final total)	yodJ	downstream of yodI (convergent), antisense?					yodJ	0.392744	0.00424809		NA	NA		1.51555	0.887		3.33526	0.9985		yodJ			yodJ				yodJ									yodJ
2.3. A. 2. not tested by 5'RACE-PCR
yoaI	yoaI	GAACATTG	12	TCATGGAAT	preferred predicted promoter	22	yoaI	1.99185	0.967121		2.11349	0.977		3.91486	0.9915		4.68026	0.9985		yoaI	similar to 4-hydroxyphenylacetate-3-hydroxylase	2.1.1 (Specific pathways)	yoaI	no	no	no	yoaI	no	no	BH3836	OB2872	no	no	no	no	yoaI	0-1 TM (mid)
		GAACA	15	TCATGGAATGA	BioOptimizer-1st prediction	22
		AAACA	14	ACATGAAATGA	BioOptimizer-2nd prediction	144
2.3. B. below cut-off in sigK+ vs. sigK- experiments but identified by overexpression of sK
cotQ-yvdQ	cotQ (yvdP)	ATGCGATT	11	GCATATTTT	possible promoter (by visual inspection)	38	cotQ (yvdP)	2.48453	0.989761		1.31041	0.79		7.24146	1		8.32361	1		cotQ (yvdP)	coat protein-similar to reticuline oxidase, renamed cotQ	4.2 (Detoxification)	cotQ (yvdP)	yvdP	ygaK	no	cotQ (yvdP)	no	no [BC0412 (ygaK)]	no [BH2730 (ysfC)]	no [OB1259 (ysfC)]	no [CAC2542 (ysfC)]	CPE0406	no	no	cotQ (yvdP)	1 TM (mid)
		TCACC	16	GCGTATTATAT	BioOptimizer-prediction
	yvdQ						yvdQ	2.70404	0.980049		1.08	0.62		1.60121	0.951		2.29186	0.9895		yvdQ	unknown	5.1 (From B. subtilis)	yvdQ	no	no	no	yvdQ	BA3129	BC3090	BH2358	OB1707	no	no	no	no	yvdQ	0 TM
cotR	cotR (yvdO)	ATACAACA	12	TCATATACT	possible promoter (by visual inspection)	28	cotR (yvdO)	3.44967	0.992412		0.926127	0.4		11.5393	0.9995		18.3525	1		cotR (yvdO)	coat protein, renamed cotR	5.2 (From other organisms)	cotR (yvdO)	no	no	no	cotR (yvdO)	no	no	no	no	no	no	no	no	cotR (yvdO)	1-2 TMs
					not included in BioOptimizer list of sequences	no
kapD	kapD	AAACGAAG	13	TCATTATTT	possible promoter (by visual inspection)	85	kapD	2.83422	0.976279		1	0.52		2.1325	0.99		3.83577	0.9985		kapD	inhibition of the KinA pathway to sporulation (exonuclease?)	1.8 (Sporulation)	kapD	yugB	no	no	kapD	kapD (BA5142)	BC4910	no	no	no [polC (CAC3442)]	no [polC (CPE1691)]	no	no	kapD	0 TM
					not included in BioOptimizer list of sequences	no
kapB not included in final total	kapB	downstream of kapD (convergent), antisense?					kapB	0.673914	0.0627586		1.1	0.56		1.23944	0.793		1.94618	0.9945		kapB			kapB				kapB									kapB
kinB not included in final total	kinB						kinB	0.587872	0.0308538		0.9	0.42		1.34038	0.8375		2.15646	0.991		kinB			kinB				kinB									kinB
yclG	yclG	GTTCCATA	12	AAATACCTA	possible promoter (by visual inspection)	158	yclG	2.43474	0.970909		0.8	0.26		2.67406	0.985		7.61006	1		yclG	unknown	6 (No similarity)	yclG	no	yorA	yomE	yclG	no	no	no	no	no	no	no	no	yclG	1 TM (Cter)
					BioOptimizer-no prediction	no
ythC	ythC	AAACGCTA	12	GAATAGAGG	possible promoter (by visual inspection)	45	ythC	4.07213	0.999275		0.864731	0.2955		3.32324	0.9995		5.70365	0.9995		ythC	unknown	6 (No similarity)	ythC	no	no	no	ythC	no	no	no	no	no	no	no	no	ythC	0-1 TM (mid)
					BioOptimizer-no prediction	no
yycOPQ	yycO	TTACTTTC	12	ATATAATGT	possible promoter (by visual inspection)	48	yycO	1.45661	0.924208		1.10589	0.64		2.23899	0.9935		2.60623	0.997		yycO	unknown	5.2 (From other organisms)	yycO	no	no	no	yycO	no	no	no	no	CAC0029	no	no	no	yycO	1 TM (Nter)
					not included in BioOptimizer list of sequences	no
	yycP						yycP	2.91255	0.956885		1.35309	0.83		1.98943	0.984		2.12753	0.9925		yycP	unknown	5.2 (From other organisms)	yycP	no	no	no	yycP	no	no	BH3844	no	no	no	no	no	yycP	secreted
	yycQ						yycQ	1.11524	0.687849		1.13809	0.68		2.61016	0.9865		2.95047	0.999		yycQ	unknown	6 (No similarity)	yycQ				yycQ	no	no	no	no	no	no	no	no	yycQ	2-3 TMs
2.3. C. not identified by overexpression of sK , but identified in sigK+ vs. sigK- experiment
cotI-ytaB	cotI (ytaA)	AATCATTT	12	TCATAAGGT	possible promoter (by visual inspection)	19	cotI (ytaA)	0.783132	0.142631		2.0507	0.95		15.521	1		15.9732	1		cotI (ytaA)	similar to spore coat protein, renamed cotI	1.8 (Sporulation)	cotI (ytaA)	ytaA	cotS	yutH	cotI (ytaA)	no	no [BC4954 (yutH)]	BH2306	no [OB2358 (yutH)]	CAC2906 (cotI/cotS)	CPE2218 (cotS/cotI)	no	no	cotI (ytaA)	0 TM
					not included in BioOptimizer list of sequences	no
	ytaB						ytaB	1.06573	0.597411		0.822831	0.24		3.32243	0.9985		5.35107	0.9995		ytaB	unknown	6 (No similarity)	ytaB	no	no	no	ytaB	no	BC3136	no	no	CA0262	CPE1985	no	no	ytaB	5 TMs
yojBC	yojB	AATCGTTT	12	GAATACTTT	possible promoter (by visual inspection)	32	yojB	0.63763	0.124554		2.60615	0.991		4.10104	0.9995		2.14365	0.9885		yojB	unknown	5.1 (From B. subtilis)	yojB	no	no	no	yojB	no	no	no	no	no	no	no	no	yojB	2 TMs
					not included in BioOptimizer list of sequences	no
	yojC						yojC	0.495245	0.0476821		4.29536	0.995		1.27613	0.7175		0.856197	0.282		yojC	unknown	5.1 (From B. subtilis)	yojC	no	no	no	yojC	no	no	no	no	no	no	no	no	yojC	0 TM
yunC-yunB	yunC	CAACAAGC	11	TCATAAAGT	possible promoter (by visual inspection)	23	yunC	1.71289	0.969668		3.01995	0.99		3.74563	0.994		3.18587	0.9975		yunC	unknown	5.1 (From B. subtilis)	yunC	no	no	no	yunC	BA5208	BC4976	BH3452	OB2372	no	no	no	no	yunC	0 TM
					not included in BioOptimizer list of sequences	no
	yunB	TTACTATG	13	GCATACATT	possible promoter (by visual inspection)	23	yunB	1.50963	0.945368		1.32305	0.7965		2.27686	0.9945		1.74674	0.9845		yunB	sporulation-inactivation results in delayed sK activation	5.2 (From other organisms)	yunB	no	no	no	yunB	BA5207	BC4975	BH1036	OB2370	CAC2300	CPE1961	no	no	yunB	secreted-pred
					not included in BioOptimizer list of sequences	no
2.3. D. not identified by overexpression of sK and not identified in sigK+ vs. sigK- experiment (either GerE is essential for expression or indirect targets)
2.3. D. 1. identified at T5.5 and T6.5
2.3.D.1. 1. ratio in gerE mutant experiment is high (>5)
aprX	aprX	TTACCAAA	13	TCATAGAGT	possible promoter (by visual inspection)	32	aprX	0.960312	0.442521		0.890658	0.34		21.9021	0.9985		11.3442	1		aprX	intracellular alkaline serine protease	2.2 (Metabolism of amino acids and related molecules)	aprX	no	aprE, epr, bpr, ispA, vpr, wprA		aprX	no	no [BC2316 (aprE)]	aprX (BH1930)	OB2375	CAC3549	aprX (CPE2610)	no	no	aprX	1-2 TMs
					not included in BioOptimizer list of sequences	no
ppiB	ppiB	no promoter found					ppiB	0.555311	0.0176344		1	0.47		1.81734	0.9745		5.25601	0.99		ppiB	peptidyl-prolyl isomerase (EC 5.2.1.8)	3.8 (Protein modification)	ppiB	cypBS	no	no	ppiB	BA4283	BC4061	BH1545	ppiB (OB1832)	CAC2769	CPE2566	lmo2376	lin2475	ppiB	0 TM
					not included in BioOptimizer list of sequences	no
thyA	thyA	TTGCGATA	12	TAATAAATT	possible promoter (by visual inspection)	40	thyA	1.20759	0.749759		1.31733	0.794		8.63954	0.9995		8.43935	0.9995		thyA	thymidylate synthase A (EC 2.1.1.45)	2.3 (Metabolism of nucleotides and nucleic acids)	thyA	no	thyB	no	thyA	thyA (BA2236)	no [BC2191 (thyB)]	no [BH3451 (thyB)]	no [OB1740 (thyB)]	CAC3003	no	no [lmo1874 (thyB)]	no [lin1988 (thyB)]	thyA	0 TM
					not included in BioOptimizer list of sequences	no
ygaK	ygaK	GGACTATA	13	CAATATTAA	possible promoter (by visual inspection)	175	ygaK	1.23895	0.715036		0.716142	0.12		3.93379	0.9985		12.9558	1		ygaK	similar to reticuline oxidase-similar to coat protein cotQ	2.1.1 (Specific pathways)	ygaK	no	yvdP	no	ygaK	no	BC0412	no	no	no	no [CPE0406 (cotQ)]	no	no	ygaK	2 TMs
					not included in BioOptimizer list of sequences	no
yhcJ	yhcJ	CCTTCATT	13	TAATAGGAA	possible promoter (by visual inspection)	140	yhcJ	1.45191	0.911678		0.747231	0.199		2.47287	0.9955		4.27169	0.999		yhcJ	similar to ABC transporter (binding lipoprotein)	1.2 (Transport/binding proteins and lipoproteins)	yhcJ	no	yusA	no	yhcJ	BA0314 (yusA/yhcJ)	BC0348 (yhcJ/yusA)	no [BH3479 (yusA)]	OB3165	no [CAC0986 (yusA)]	no	no [lmo0285 (yusA)]	no [lin0313 (yusA)]	yhcJ	1 TM (Nter)
		TGACA	14	GAGTAAGGTAA	BioOptimizer-unlikely	no
yjaU	yjaU	ATTCGTTT	11	ACATAAGAT	possible promoter (by visual inspection)	36	yjaU	1.5844	0.941583		1.27215	0.79		5.14871	0.999		7.91586	1		yjaU	unknown	5.1 (From B. subtilis)	yjaU	no	no	no	yjaU	BA1180	BC1170	BH2892	no	no	no	no	no	yjaU	0 TM
					not included in BioOptimizer list of sequences	no
ymaG	ymaG	GTTCTCTC	11	TGATAAGCA	possible promoter (by visual inspection)	48	ymaG	0.712665	0.324693		1.27309	0.78		5.11855	0.9995		5.03761	0.999		ymaG	similar to cell wall protein	1.1 (Cell wall)	ymaG	no	no	no	ymaG	no	no	no	no	no	no	no	no	ymaG	1 TM (mid)
		wrong translation start site			BioOptimizer-no prediction	no
yodN-yozD	yodN	ATGCGAAT	12	GCATACGAT	possible promoter (by visual inspection)	36	yodN	1.07139	0.588416		2.30545	0.89		33.4418	0.9865		7.48717	1		yodN	unknown	6 (No similarity)	yodN	no	no	no	yodN	BA2303	BC2254	no	no	no	no	no	no	yodN	1 TM (Nter)
					not included in BioOptimizer list of sequences	no
	yozD						yozD	1.29679	0.863103		0.7	0.128		NA	NA		5.21151	0.998		yozD	unknown	6 (No similarity)	yozD	no	no	no	yozD	BA2305	BC2256	no	no	no	no	no	no	yozD	0 TM
yodU-ypqP	yodU	ATTCGATT	10	ACATATGAT	possible promoter (by visual inspection)	34	yodU	0.618531	0.254996		1.08774	0.61		6.81464	0.999		12.3942	1		yodU	putative UDP-Glc isomerase	4.1 (Adaptation to atypical conditions)	yodU	no	no	yveM (Nter), spsJ, ytcB	yodU	no	no [BC3750 (yveM)]	no [BH3718 (yveM)]	no [OB2896 (yveM)]	no [CAC2194 (yveM)]	no [CPE0463 (yveM)]	no	no	yodU	0-1 TM
	ypqP	interrupted by SPb in 168, should be next to yodU in PY79					ypqP	0.850103	0.251485		1.1	0.67		8.64001	0.9985		14.4611	1		ypqP	putative glucosyl-1-P transferase; this ORF is interrupted by insertion of the SPb prophage in strain 168	4.1 (Adaptation to atypical conditions)	ypqP	no	yveM (Cter)	no	ypqP	no	no [BC3750 (yveM)]	no [BH3718 (yveM)]	no [OB2896 (yveM)]	no [CAC2194 (yveM)]	no [CPE0463 (yveM)]	no	no	ypqP	0 TM
yubC	yubC	CCTCTAAA	12	AAATACCAT	possible promoter (by visual inspection)	42	yubC	1.43083	0.838431		0.964483	0.467		10.4657	1		9.56669	1		yubC	similar to cysteine dioxygenase	2.2 (Metabolism of amino acids and related molecules)	yubC	no	no	no	yubC	no	no	no	no	no	no	no	no	yubC	0 TM
					not included in BioOptimizer list of sequences	no
ywhKL	ywhK	AAGCAAAC	11	CCATATTCT	possible promoter (by visual inspection)	45	ywhK	0.613271	0.0416385		0.64	0.09		1.84327	0.9715		6.58048	0.9995		ywhK	unknown	5.2 (From other organisms)	ywhK	no	ywhL	no	ywhK	no	no	no	no	no	no	no	no	ywhK	2 TMs
					not included in BioOptimizer list of sequences	no
	ywhL						ywhL	0.909854	0.42494		0.57	0.08		1.13028	0.6115		4.2682	0.999		ywhL	unknown	5.2 (From other organisms)	ywhL	no	ywhK	no	ywhL	no	no	no	no	no	no	no	no	ywhL	2-3 TMs
albG (ywhM) (not included in final total)	albG (ywhM)	downstream of ywhKL (convergent), antisense?					albG (ywhM)	1.23581	0.817585		0.67	0.18		1.34053	0.8385		2.50303	0.9685		albG (ywhM)			albG (ywhM)				albG (ywhM)									albG (ywhM)
yxkD	yxkD	GGACTGTG	13	ACATAGCAG	possible promoter (by visual inspection)	116	yxkD	1.48474	0.942598		0.707062	0.13		2.32925	0.99		5.40383	1		yxkD	unknown	5.2 (From other organisms)	yxkD	no	yqfU, ypjC, yvjA, yitT, ydeO	yitE	yxkD	BA3266	BC3229	no [BH1678 (ypjC)]	OB0982	no [CAC0848 (yjvA)]	no [CPE0298 (yjvA)]	lmo1252	lin1219	yxkD	5 TMs
					not included in BioOptimizer list of sequences	no
GENES IN SECTIONS 2.3.D.1. 2. and 2.3.D.2 ARE NOT INCLUDED IN THE FINAL TOTAL OF SIGK-CONTROLLED GENES
2.3.D.1.2. ratio in gerE mutant experiment is low (thus considered to be an indirect target and not included in final list)
cdd-era-recO	cdd	no promoter found, probably indirect					cdd	1.33406	0.888119		1	0.47		1.8206	0.979		2.32689	0.996		cdd			cdd				cdd									cdd
	era (bex)						era (bex)	1.4228	0.925543		0.97	0.47		1.65129	0.9635		2.11224	0.994		era (bex)			era (bex)				era (bex)									era (bex)
	recO (yqxN)						recO (yqxN)	1.72865	0.976743		0.98	0.46		1.44843	0.9145		1.85979	0.983		recO (yqxN)			recO (yqxN)				recO (yqxN)									recO (yqxN)
hisZGDBHAFI	hisZ	no promoter found, probably indirect					hisZ	1.44018	0.928197		0.7	0.14		3.56085	0.9955		3.02423	0.9915		hisZ			hisZ				hisZ									hisZ
	hisG						hisG	1.94851	0.976019		0.7	0.08		2.61925	0.9985		4.2013	1		hisG			hisG				hisG									hisG
	hisD						hisD	1.71831	0.960978		0.7	0.14		3.19596	0.9975		3.68652	0.996		hisD			hisD				hisD									hisD
	hisB						hisB	1.31137	0.850054		0.7	0.13		3.50232	0.9995		2.8725	0.997		hisB			hisB				hisB									hisB
	hisH						hisH	1.142	0.721497		0.8	0.18		3.70815	0.992		5.4533	1		hisH			hisH				hisH									hisH
	hisA						hisA	1.06134	0.608149		0.7	0.12		3.86879	0.998		5.05403	0.9995		hisA			hisA				hisA									hisA
	hisF						hisF	0.822492	0.215017		0.7	0.13		3.06707	0.9985		3.62807	1		hisF			hisF				hisF									hisF
yeeK	yeeK	ATACGATC	12	TCATACTCT	possible promoter (by visual inspection)	32	yeeK	0.878509	0.2784		0.79752	0.24		2.73471	0.995		2.69092	0.9975		yeeK			yeeK				yeeK									yeeK
yhcN	yhcN	false positive?			sigG and sigF, lacZ fusion expression is sigK independent		yhcN	1.291	0.828539		1.1	0.59		2.14386	0.983		3.17933	0.9895		yhcN			yhcN				yhcN									yhcN
yhfC	yhfC	TAGCTGTA	12	ACATATGAA	possible promoter (by visual inspection)	120	yhfC	1.07862	0.632598		0.9	0.37		1.85894	0.9645		3.79594	0.9995		yhfC			yhfC				yhfC									yhfC
yktC	yktC	no promoter found, probably indirect					yktC	0.456442	0.00951385		0.89	0.34		1.85197	0.9815		2.4181	0.996		yktC			yktC				yktC									yktC
yoaJ	yoaJ	GTTCATTT	13	TCATAAGTA	possible promoter (by visual inspection)	136	yoaJ	0.861922	0.277889		0.82009	0.26		1.83087	0.973		2.54538	0.999		yoaJ			yoaJ				yoaJ									yoaJ
yusV	yusV	CTACAATG	12	CCATATCAA	possible promoter (by visual inspection)	109	yusV	0.781112	0.140403		0.95311	0.44		2.23504	0.9895		2.1735	0.9895		yusV			yusV				yusV									yusV
yuxJ-pbpD	yuxJ	no promoter found, probably indirect			divergent from kapD		yuxJ	1.28917	0.848938		1.4	0.88		1.8179	0.967		2.73833	0.9975		yuxJ			yuxJ				yuxJ									yuxJ
	pbpD						pbpD	0.960805	0.427848		1.2	0.72		1.00777	0.512		2.04698	0.9945		pbpD			pbpD				pbpD									pbpD
2.3. D. 2. identified at only one of the two time points and ratios are low (probaly indirect, not included in final list)
ccdA	ccdA						ccdA	0.99858	0.498751		0.853427	0.294		1.29717	0.8435		2.44905	0.9925		ccdA			ccdA				ccdA									ccdA
comFA	comFA	GGACAGAA	13	GCATACTGT	possible promoter (by visual inspection)	20	comFA	0.719467	0.103177		0.8	0.21		0.73386	0.1195		1.66783	0.947		comFA			comFA				comFA									comFA
deoD	deoD	no promoter found, probably indirect					deoD	0.512025	0.0141282		1.1	0.59		1.67062	0.9615		2.65755	0.9995		deoD			deoD				deoD									deoD
pksL	pksL	no promoter found, probably indirect					pksL	1.97306	0.983966		1.17753	0.718		0.556847	0.1125		2.41936	0.958		pksL			pksL				pksL									pksL
purEKBCSQLFMNHD	purE	no promoter found, probably indirect					purE	0.943791	0.395786		1.1	0.58		NA	NA		2.84243	0.9965		purE			purE				purE									purE
	purK						purK	1.23285	0.81955		1	0.54		0.955599	0.427		2.50914	0.9945		purK			purK				purK									purK
	purB						purB	1.86959	0.983916		1.1	0.56		NA	NA		2.34742	0.9605		purB			purB				purB									purB
	purC						purC	1.81817	0.982205		1	0.5		0.983166	0.4765		2.34898	0.9885		purC			purC				purC									purC
	purS (yexA)						purS (yexA)	1.59876	0.964633		0.887969	0.3515		0.963827	0.4395		2.38431	0.9945		purS (yexA)			purS (yexA)				purS (yexA)									purS (yexA)
	purQ						purQ	2.81915	0.998068		1	0.54		0.943322	0.42		2.36818	0.987		purQ			purQ				purQ									purQ
	purL						purL	1.67254	0.97333		0.9	0.38		0.971483	0.4495		2.26255	0.988		purL			purL				purL									purL
	purF						purF	3.35613	0.998867		1	0.51		NA	NA		2.81692	0.9625		purF			purF				purF									purF
	purH						purH	2.02082	0.982601		0.9	0.4		1.12608	0.683		2.03797	0.977		purH			purH				purH									purH
	purD						purD	1.42894	0.926373		0.848054	0.2875		1.00862	0.5155		2.87016	0.978		purD			purD				purD									purD
pyrRPBC-AA-AB-KDFE	pyrR	no promoter found, probably indirect					pyrR	0.727254	0.0999659		1.49387	0.8905		1.04284	0.57		1.66266	0.939		pyrR			pyrR				pyrR									pyrR
	pyrP						pyrP	1.23843	0.822149		1.23426	0.7675		0.940459	0.391		1.83	0.9165		pyrP			pyrP				pyrP									pyrP
	pyrB						pyrB	0.802791	0.169619		1.30342	0.8055		0.946181	0.4065		2.07959	0.9315		pyrB			pyrB				pyrB									pyrB
	pyrC						pyrC	0.802013	0.183357		1.30282	0.827		1.03084	0.549		1.58869	0.85		pyrC			pyrC				pyrC									pyrC
	pyrAA						pyrAA	0.81361	0.180415		1.2111	0.74		1.12399	0.6595		2.09748	0.953		pyrAA			pyrAA				pyrAA									pyrAA
	pyrAB						pyrAB	0.975888	0.458031		0.96799	0.4525		1.1441	0.711		1.43522	0.9125		pyrAB			pyrAB				pyrAB									pyrAB
	pyrK						pyrK	NA	NA		1.10994	0.6485		1.01954	0.535		1.62619	0.8755		pyrK			pyrK				pyrK									pyrK
	pyrD						pyrD	0.915784	0.34502		1.03213	0.5545		1.02271	0.525		1.81562	0.9525		pyrD			pyrD				pyrD									pyrD
	pyrF						pyrF	0.707641	0.0770517		1.07706	0.604		0.996417	0.494		1.41688	0.7405		pyrF			pyrF				pyrF									pyrF
	pyrE						pyrE	0.614543	0.0374355		1.00939	0.516		1.15625	0.693		1.62556	0.9315		pyrE			pyrE				pyrE									pyrE
rok (ykuW)	rok (ykuW)	no promoter found, probably indirect					rok (ykuW)	0.603225	0.0291188		1.1	0.67		1.16612	0.709		2.40347	0.995		rok (ykuW)			rok (ykuW)				rok (ykuW)									rok (ykuW)
rplJ	rplJ						rplJ	1.9474	0.985855		1.0378	0.5425		2.18146	0.953		1.23658	0.8305		rplJ			rplJ				rplJ									rplJ
ybaS	ybaS	TAACATAC	13	TGATATAAT	possible promoter (by visual inspection)	143	ybaS	1.58107	0.959279		0.73	0.16		1.44161	0.9085		2.05078	0.948		ybaS			ybaS				ybaS									ybaS
ycnKJI	ycnK	TCTCTAAA	13	AAATAGATC	possible promoter (by visual inspection)	20	ycnK	1.3931	0.909151		0.91357	0.384		1.11469	0.6605		2.08892	0.9955		ycnK			ycnK				ycnK									ycnK
	ycnJ						ycnJ	2.91932	0.996144		0.953206	0.429		1.07096	0.608		1.57248	0.964		ycnJ			ycnJ				ycnJ									ycnJ
	ycnI						ycnI	1.92158	0.980427		0.884411	0.3275		1.12326	0.688		1.92481	0.984		ycnI			ycnI				ycnI									ycnI
yczE	yczE	no promoter found, probably indirect					yczE	0.996618	0.496074		0.7	0.11		NA	NA		3.22213	0.994		yczE			yczE				yczE									yczE
yefA	yefA	no promoter found, probably indirect					yefA	1.00217	0.504016		0.87	0.32		1.41587	0.8545		3.04588	0.9965		yefA			yefA				yefA									yefA
yefB	yefB	downstream of yefA (convergent)					yefB	1.13546	0.689687		1.05858	0.5695		1.1333	0.614		2.69082	0.9915		yefB			yefB				yefB									yefB
yjzB	yjzB	AAACTATC	12	TCATAGAGT	possible promoter (by visual inspection)	22	yjzB	1.34315	0.83414		0.89	0.39		1.40753	0.767		2.75355	0.989		yjzB			yjzB				yjzB									yjzB
yoeB	yoeB	AATCTATC	13	ACATTTGTA	possible promoter (by visual inspection)	35	yoeB	0.85756	0.244098		1.2	0.721		1.11646	0.6625		1.95153	0.9795		yoeB			yoeB				yoeB									yoeB
yuaC	yuaC						yuaC	1.00147	0.501957		0.663842	0.0935		1.1616	0.6935		2.10134	0.9815		yuaC			yuaC				yuaC									yuaC
ywaE	ywaE	GACTCTG	13	CATAGCTA	possible promoter (by visual inspection)	32	ywaE	1.25391	0.812933		0.75	0.17		1.53722	0.9315		2.41012	0.933		ywaE			ywaE				ywaE									ywaE
yxaI	yxaI	no promoter found, probably indirect					yxaI	0.704411	0.183511		1.1	0.61		NA	NA		2.98667	0.99		yxaI			yxaI				yxaI									yxaI
3. sK-CONTROLLED GENES UNAFFECTED BY GerE:
3.1. Previously identified sK-controlled genes (with mapped transcription start site):
3.1. A) also identified in overexpression
cotVW	cotV	TTCCGCTC	12	GCATTATAT	AGAGTAT (mapped sigK promoter)	29	cotV	5.77754	0.999814		29.4442	1		1.53279	0.9455		1.18376	0.7735		cotV	spore coat protein (insoluble fraction)	1.8 (Sporulation)	cotV	no	no	no	cotV	no	no	no [cotX]	no [OB0575/OB0574 (cotX)]	no	no	no	no	cotV	1-2 TMs
					BioOptimizer-no prediction	no
	cotW						cotW	7.0845	0.999862		31.4775	1		1.54077	0.949		1.31717	0.8565		cotW	spore coat protein (insoluble fraction)	1.8 (Sporulation)	cotW	no	no	no	cotW	no	no	no	no	no	no	no	no	cotW	0 TM
gerE	gerE	TCACCTCC	12	ACATATGAT	ATCTCGAC (mapped sigK promoter)	67	gerE	3.34319	0.998905		NA	NA		NA	NA		NA	NA		gerE	transcriptional regulator required for the expression of late spore coat genes	3.5.2 (Transcription regulation)	gerE	no	no	degU, yvqC, yhcZ, yocG…	gerE	gerE (BA4724)	BC4501	gerE (BH3075)	OB2110	no [CAC2254 (yfiK)]	no	no [lmo2515 (degU)]	no [lin2625 (degU)]	gerE	0 TM
		TCACC	15	ACATATGATAT	BioOptimizer prediction-correct	65
ysmB (not included in final total)	ysmB						ysmB	1.49268	0.940327		1.14207	0.68		5.98549	1		8.5984	1		ysmB			ysmB				ysmB									ysmB
racE (not included in final total)	racE						racE	0.974723	0.453471		0.964492	0.45		7.74655	0.9995		9.81968	1		racE			racE				racE									racE
spoVIF (yjcC)	spoVIF (yjcC)	GCACATTG	12	TCATACAAT	ACCGTATTA	"+17"	spoVIF (yjcC)	8.03919	0.999855		2.83792	0.993		1.29831	0.819		1.1979	0.7865		spoVIF (yjcC)	unknown-stabilization of GerE, renamed spoVIF (Kuwana et al., 2003)	5.1 (From B. subtilis)	spoVIF (yjcC)	yjcC	no	no	spoVIF (yjcC)	BA1527	BC1506	BH1641	OB1795	no	no	no	no	spoVIF (yjcC)	0 TM
					not included in BioOptimizer list of sequences	no
yjcB	yjcB	TAACGAGG	12	GCATATATC	ATAAGCGGGGGG	61	yjcB	16.8973	0.999885		1.91426	0.974		1.37047	0.8855		1.32615	0.8825		yjcB	unknown	6 (No similarity)	yjcB	no	no	no	yjcB	no	no	no	no	no	no	no	no	yjcB	0 TM
					not included in BioOptimizer list of sequences	no
3.1. B) below cut-off in sigK+ vs. sigK- experiments but identified by overexpression of sE
none
3.1.C) not identified by overexpression
none
3.1.D) not identified by overexpression, nor in sigK+ vs. sigK- experiment
yjcZ	yjcZ	CCAAGCCG	13	ACATAGTGT	ATAGAGAGT	26	yjcZ	not on the array			not on the array			not on the array			not on the array			yjcZ	(Kuwana et al., 2003)-not annotated in SubtiList database		yjcZ	no	no	no	yjcZ	no	no	no	no	no	no	no	no	yjcZ	ND
					not included in BioOptimizer list of sequences	no
3.2. Previously reported sK-controlled genes (but transcription start site has not been mapped):
none
3.3. Newly identified sK-controlled genes:
3.3. A. also identified by overexpression of sK
3.3. A. 1. promoter confirmed by 5'RACE-PCR
yfnED	yfnE	AAGCAAGC	12	GCATATAAT	TCGAGGAGCGTCTT (5'RACE)	"+33"	yfnE	12.8638	0.99997		6.93426	0.999		0.933201	0.402		1.46762	0.93		yfnE	similar to glycosyl transferase	6 (No similarity)	yfnE	no	no	yveR, tuaG, yveo, ggaB, ggaA, yveT, spsA, ywdF	yfnE	no	no	no [BH3713 (tuaG)]	no [OB2922 (tuaG)]	no [CAC2173 (yveO)]	no [CPE0719 (yveR)]	no [lmo1091 (yveT)]	no [lin1068 (tagB)]	yfnE	0 TM
		GCACA	14	GCATGAACTGT	BioOptimizer-prediction-ruled out by 5'RACE	117
	yfnD						yfnD	9.42462	0.999747		6.25173	0.996		0.93495	0.386		1.3715	0.8995		yfnD	unknown	5.1 (From B. subtilis)	yfnD	no	yfnF	no	yfnD	no	no	no	no	no	no	no	no	yfnD	0 TM
yhcOP	yhcO	ACACACTG	12	GCATAGAGT	AAAAATAAAAAGGTACAA (5'RACE)	104	yhcO	8.58604	0.999768		2.51189	0.993		0.913349	0.365		0.66812	0.092		yhcO	unknown	6 (No similarity)	yhcO	no	no	no	yhcO	no	no	no	no	no	no	no	no	yhcO	1 TM (Nter)
		ACACA	15	GCATAGAGTAA	BioOptimizer-confirmed by 5'RACE	102
	yhcP						yhcP	2.13657	0.992866		2.55859	0.984		0.830516	0.2325		0.601426	0.0515		yhcP	unknown	6 (No similarity)	yhcP	no	no	no	yhcP	no	no	no	no	no	no	no	no	yhcP	0 TM
ypqA	ypqA	TAACAACA	12	GCATAATCT	GGTTAAAAAAGGCGG (5'RACE)	23	ypqA	2.30239	0.992493		4.94311	0.998		0.800673	0.2495		0.704984	0.1135		ypqA	unknown	6 (No similarity)	ypqA	no	no	no	ypqA	no	no	no	no	no	no	no	no	ypqA	0 TM
		TAACA	15	GCATAATCTGG	BioOptimizer-confirmed by 5'RACE	21
3.3. A. 2. not tested by 5'RACE-PCR
guaC (yumD)	guaC (yumD)	GCACCACA	12	TCATAATGT	predicted sigK promoter	89	guaC (yumD)	2.13853	0.992591		2.2751	0.982		0.949724	0.4175		0.977321	0.471		guaC (yumD)	GMP reductase	2.3 (Metabolism of nucleotides and nucleic acids)	guaC (yumD)	yumD	guaB	no	guaC (yumD)	guaC (BA5705)	BC5452	guaB (BH0020)	OB1310	CAC3471	CPE2276	no	no	guaC (yumD)	1 TM (mid)
		GCACC	15	TCATAATGTTT	BioOptimizer-prediction	87
yrpC	yrpC	ATTCGAAT	12	CCATATTAA	possible promoter (by visual inspection)	91	yrpC	2.12261	0.979534		1.99526	0.977		1.08697	0.6315		1.33401	0.882		yrpC	similar to glutamate racemase	2.2 (Metabolism of amino acids and related molecules)	yrpC	no	racE	no	yrpC	racE-2 (BA4717)	BC4496	no [BH3071(racE)]	no [OB2108(racE)]	CAC3250	CPE2568	no [racE ]	no [racE ]	yrpC	0-1 TM
					BioOptimizer-no prediction	no
ytcABC	ytcA	TCACGAAC	12	AAATAGGAT	predicted sigK promoter	40	ytcA	3.25917	0.991576		14.9624	1		1.14647	0.707		0.639667	0.0395		ytcA	similar to NDP-sugar dehydrogenase	2.1.1 (Specific pathways)	ytcA	no	tuaD, ywqF		ytcA	no	no	no [BH3708 (tuaD)]	no [OB2884 (ywqF)]	no	no [CPE0494 (ywqF)]	no	no	ytcA	1 (Nter)-2 TMs
		TCACG	14	TAATAGGATAT	BioOptimizer-prediction	38
	ytcB						ytcB	6.44934	0.999669		22.4905	1		1.27468	0.8205		0.697924	0.0695		ytcB	similar to NDP-sugar epimerase	2.1.1 (Specific pathways)	ytcB	no	spsJ, galE, yfnG	yodU	ytcB	no	no	BH2304	OB2082	CAC0794	no	no	no	ytcB	1-2 TMs
	ytcC						ytcC	5.78835	0.99982		16.5577	1		1.2642	0.804		0.655782	0.0495		ytcC	similar to lipopolysaccharide N-acetylglucosaminyltransferase (glycosyl transferase family)	1.1 (Cell wall)	ytcC	no	cotSA	ypjH, yveN, yqgM, tuaC	ytcC	no	no	BH2305	no	no [CAC1053 (yqgM)]	no [CPE0498 (cotSA)]	no	no [lin2700 (ypjH)]	ytcC	0 TM
ywnF	ywnF	GCACCTGC	12	ACATATGAT	predicted sigK promoter	44	ywnF	3.98621	0.996749		2.50035	0.993		0.726329	0.143		0.66219	0.0655		ywnF	unknown	5.1 (From B. subtilis)	ywnF	no	no	no	ywnF	no	no	BH1886	no	no	no	no	no	ywnF	2 TMs
		GCACC	15	ACATATGATAA	BioOptimizer-prediction	42
GENES IN SECTIONS 3.3.B) and 3.3.C) ARE NOT INCLUDED IN THE FINAL TOTAL OF SIGK-CONTROLLED GENES
3.3. B) below cut-off in sigK+ vs. sigK- experiments but identified by overexpression of sK
yxeF	yxeF	CTGCGGAT	11	TCATAGTGG	possible promoter (by visual inspection)	143	yxeF	1.77826	0.977206		1.70216	0.95		0.905286	0.337		0.634246	0.162		yxeF			yxeF				yxeF									yxeF
					BioOptimizer-no prediction	no
3.3. C) not identified by overexpression of sK
a) ratio in sigK+ vs. sigK- experiment is high (>3)
ycsK	ycsK	TTTCAAGA	11	ACATAAGTA	possible promoter (by visual inspection)	60	ycsK	0.468894	0.0116729		11.8032	1		0.974548	0.465		1.1844	0.768		ycsK			ycsK				ycsK									ycsK
yppG	yppG	AAACAATA	12	ACATATATA	possible promoter (by visual inspection)	35	yppG	0.694865	0.286074		5.82861	0.9995		0.87106	0.2935		0.604102	0.0325		yppG			yppG				yppG									yppG
		convergent with ypqA
yqbM	yqbM	inside skin element-no promoter found-start site maybe incorrect					yqbM	1.60418	0.943421		3.53997	0.954		0.988522	0.483		0.724233	0.0875		yqbM			yqbM				yqbM									yqbM
b) ratio in sigK+ vs. sigK- experiment is low (thus considered to be an indirect target and not included in final list)
dapF (yutL)	dapF (yutL)	no promoter found					dapF (yutL)	0.652982	0.0456805		2.25944	0.976		0.741112	0.128		0.625123	0.0345		dapF (yutL)			dapF (yutL)				dapF (yutL)									dapF (yutL)
mtn-yrhA	mtn (yrrU)	no promoter found					mtn (yrrU)	0.849104	0.251646		1.81552	0.966		0.874762	0.2945		0.767663	0.152		mtn (yrrU)			mtn (yrrU)				mtn (yrrU)									mtn (yrrU)
	yrhA	no promoter found					yrhA	1.3069	0.869233		2.91072	0.99		1.12897	0.697		0.743446	0.14		yrhA			yrhA				yrhA									yrhA
nagP	nagP (yflF)	GTCATTC	14	AATAATCT	possible promoter (by visual inspection)	140	nagP (yflF)	1.2084	0.710767		2.79254	0.986		0.712898	0.1095		0.662667	0.081		nagP (yflF)			nagP (yflF)				nagP (yflF)									nagP (yflF)
ribH	ribH	ACAAGC	14	CATTTCTA	possible promoter (by visual inspection)	33	ribH	0.558396	0.0865622		2.89068	0.986		1.20669	0.784		0.951123	0.424		ribH			ribH				ribH									ribH
ydfC	ydfC	ATCTTTA	14	CATTAAAT	possible promoter (by visual inspection)	34	ydfC	0.411421	0.0632344		2.32274	0.986		1.05538	0.59		1.00617	0.512		ydfC			ydfC				ydfC									ydfC
yebC	yebC	TGCAAAA	13	CATACGAT	possible promoter (by visual inspection)	131	yebC	1.73061	0.836344		2.07491	0.967		0.794032	0.1815		0.609419	0.0325		yebC			yebC				yebC									yebC
yhjA	yhjA	AACATGT	12	AATAGTGA	possible promoter (by visual inspection)	127	yhjA	0.954015	0.419812		2.02768	0.975		0.917158	0.371		0.494853	0.0825		yhjA			yhjA				yhjA									yhjA
yppF	yppF	divergent with yppG (no promoter found)					yppF	0.150034	0.000830728		2.91072	0.996		1.01959	0.525		1.06393	0.593		yppF			yppF				yppF									yppF
ypuBC	ypuB	no promoter found					ypuB	0.500592	0.113449		2.03236	0.977		0.885667	0.3335		0.254454	0.0995		ypuB			ypuB				ypuB									ypuB
	ypuC						ypuC	0.861069	0.368663		2.51768	0.99		0.770028	0.153		0.611513	0.048		ypuC			ypuC				ypuC									ypuC
4. sE-CONTROLLED GENES turned on by sK overexpression (but not identified in sigK mutant experiment):
cwlJ	cwlJ	TCATCAC	14	AATATGAT	GAAAAGAGA (mapped sE promoter)	27	cwlJ	2.76504	0.996092		0.868967	0.3145		0.903436	0.3595		0.75408	0.1385		cwlJ			cwlJ				cwlJ									cwlJ
phoB-ydhF	phoB	TTCTAAA	14	AATAACCA	TTATTTAAGGGTG	119	phoB	1.8236	0.956316		0.801417	0.2135		1.10122	0.6415		1.22574	0.8035		phoB			phoB				phoB									phoB
	ydhF						ydhF	0.887443	0.347427		0.893056	0.3545		1.11272	0.653		1.26949	0.842		ydhF			ydhF				ydhF									ydhF
prkA	prkA	GCATGTA	14	CATAGATT	GTATCAAAGT (mapped sE promoter)	53	prkA	1.8727	0.979494		0.808178	0.234		1.05035	0.576		0.936202	0.373		prkA			prkA				prkA									prkA
spoIIM	spoIIM	GCATGTT	13	CATACAAT	CTATTAAA	40	spoIIM	2.49048	0.980097		0.772799	0.178		1.211	0.785		1.13424	0.694		spoIIM			spoIIM				spoIIM									spoIIM
spoIIIAA-AB-AC-AD-AE-AF-AG-AH	spoIIIAA	TCATAAA	13	CATACATT	TTAAAGAAGC	36	spoIIIAA	1.60849	0.963592		0.932567	0.399		1.16512	0.7165		1.27112	0.8475		spoIIIAA			spoIIIAA				spoIIIAA									spoIIIAA
	spoIIIAB						spoIIIAB	2.42774	0.995754		0.994414	0.4905		1.13532	0.6935		1.35431	0.873		spoIIIAB			spoIIIAB				spoIIIAB									spoIIIAB
	spoIIIAC						spoIIIAC	2.11164	0.991644		0.846988	0.274		1.13225	0.696		1.3016	0.8545		spoIIIAC			spoIIIAC				spoIIIAC									spoIIIAC
	spoIIIAD						spoIIIAD	1.46068	0.937925		0.837484	0.268		1.18613	0.692		1.27743	0.843		spoIIIAD			spoIIIAD				spoIIIAD									spoIIIAD
	spoIIIAE						spoIIIAE	1.37599	0.736563		0.917569	0.367		1.36448	0.854		1.29135	0.8615		spoIIIAE			spoIIIAE				spoIIIAE									spoIIIAE
spoIIIAF-AG-AH	spoIIIAF	predicted sE promoter (within the spoIIIA operon, Stragier)					spoIIIAF	2.44549	0.995088		0.998779	0.499		1.18057	0.7445		1.28322	0.821		spoIIIAF			spoIIIAF				spoIIIAF									spoIIIAF
	spoIIIAG						spoIIIAG	2.18945	0.992841		1.16035	0.6955		1.18973	0.763		1.25354	0.816		spoIIIAG			spoIIIAG				spoIIIAG									spoIIIAG
	spoIIIAH						spoIIIAH	1.36547	0.900479		0.935749	0.4145		1.19549	0.79		1.23651	0.8155		spoIIIAH			spoIIIAH				spoIIIAH									spoIIIAH
spoIVFA-FB	spoIVFA	GAATATT	14	CATATGAT	GTACAAAC	33	spoIVFA	1.38533	0.910587		0.997113	0.4955		1.05406	0.5795		1.27332	0.853		spoIVFA			spoIVFA				spoIVFA									spoIVFA
	spoIVFB						spoIVFB	2.39593	0.953896		0.947929	0.4125		1.31619	0.8465		1.27978	0.844		spoIVFB			spoIVFB				spoIVFB									spoIVFB
spoVE	spoVE	ACATGTT	13	CATATGCT	TAAGTAAGGG (mapped sE promoter)	67	spoVE	2.76597	0.997052		0.918143	0.38		1.10136	0.648		1.30372	0.8535		spoVE			spoVE				spoVE									spoVE
spoVR	spoVR	TCATCTT	14	CATACATT	ATAGATAAGTC (mapped sE promoter)	29	spoVR	3.3912	0.998677		1.3737	0.812		0.723769	0.1265		0.469624	0.005		spoVR			spoVR				spoVR									spoVR
ycgF-G	ycgF	GCATAGC	14	AATAAATT	GTACAAGTT (5'RACE)	34	ycgF	2.32757	0.994785		0.92168	0.39		0.996992	0.493		1.0989	0.639		ycgF			ycgF				ycgF									ycgF
	ycgG	probably has its own sK promoter (see above)					ycgG	3.8019	0.997631		2.41184	0.985		0.752146	0.1345		0.496184	0.0185		ycgG			ycgG				ycgG									ycgG
yhbH	yhbH	GTCAATT	15	CATATGAT	GAATATAAATCTT (mapped sE promoter)	93	yhbH	7.49986	0.999737		1.7186	0.93		1.09658	0.629		1.09235	0.6375		yhbH			yhbH				yhbH									yhbH
yheC-D	yheC	GAATCGT	14	AATACCGT	predicted sE promoter	82	yheC	2.0107	0.971677		0.430245	0.0185		1.11284	0.668		1.2954	0.8525		yheC			yheC				yheC									yheC
	yheD						yheD	0.975597	0.455409		0.483423	0.0205		1.13583	0.69		1.3075	0.864		yheD			yheD				yheD									yheD
	yhfN	GAATTTG	13	AATAGAAG	predicted sE promoter	29	yhfN	2.24656	0.946941		0.903026	0.362		1.27034	0.8255		1.28543	0.8385		yhfN			yhfN				yhfN									yhfN
yisY	yisY	AGATCGT	14	CATATAGT	predicted sE promoter	123	yisY	3.29767	0.998716		1.71935	0.94		0.618656	0.058		0.444431	0.01		yisY			yisY				yisY									yisY
yjmC-D-uxuA-yjmF-exuT-R	yjmC	GAATATT	14	AATAAAAT	GTGTTTGTAG	61	yjmC	1.46848	0.922492		0.749445	0.163		1.24359	0.8005		1.32191	0.839		yjmC			yjmC				yjmC									yjmC
	yjmD						yjmD	2.20057	0.979731		0.778327	0.204		1.2633	0.82		1.27924	0.828		yjmD			yjmD				yjmD									yjmD
	uxuA (yjmE)						uxuA (yjmE)	1.28875	0.832115		0.831584	0.2505		1.17565	0.7485		1.28539	0.8485		uxuA (yjmE)			uxuA (yjmE)				uxuA (yjmE)									uxuA (yjmE)
	yjmF						yjmF	2.31926	0.983681		0.870519	0.307		1.17228	0.743		1.1753	0.7365		yjmF			yjmF				yjmF									yjmF
	exuT (yjmG)						exuT (yjmG)	2.15609	0.981371		0.927935	0.396		1.14489	0.7235		1.14412	0.6865		exuT (yjmG)			exuT (yjmG)				exuT (yjmG)									exuT (yjmG)
	exuR (yjmH)						exuR (yjmH)	0.857555	0.271936		0.968707	0.449		1.04198	0.562		0.946326	0.404		exuR (yjmH)			exuR (yjmH)				exuR (yjmH)									exuR (yjmH)
yndA	yndA	TCATAAA	13	AATATAAT	predicted sE promoter	112	yndA	3.06019	0.996773		1.13696	0.662		0.945371	0.4065		0.7825	0.1515		yndA			yndA				yndA									yndA
yngJ-I-H-G-F-E	yngJ	GAATGAT	14	AATAGGAT	GTTACAAAGATGTGA (5'RACE)	28	yngJ	2.57591	0.995595		0.687381	0.1305		1.23535	0.8		0.890787	0.316		yngJ			yngJ				yngJ									yngJ
	yngI						yngI	3.9805	0.992255		0.786084	0.198		1.26769	0.845		0.845381	0.245		yngI			yngI				yngI									yngI
	yngH						yngH	0.711928	0.134953		0.789841	0.2075		1.14214	0.69		0.853964	0.2455		yngH			yngH				yngH									yngH
	yngG						yngG	1.88605	0.955899		0.75671	0.187		1.15302	0.7205		0.890114	0.326		yngG			yngG				yngG									yngG
	yngF						yngF	0.593964	0.0743606		0.800854	0.228		1.25313	0.82		0.88802	0.303		yngF			yngF				yngF									yngF
	yngE						yngE	1.28662	0.756525		0.881533	0.3365		1.27625	0.835		0.879694	0.2845		yngE			yngE				yngE									yngE
yqfT	yqfT	ACACATT	13	CATACATT	predicted sE promoter	22	yqfT	2.92648	0.997734		1.4	0.87		0.464258	0.012		0.35141	0.019		yqfT			yqfT				yqfT									yqfT
ysnE	ysnE	TTATATT	14	AATATGAT	predicted sE promoter (readthrough from ysnD is also a possibility)	56	ysnE	1.5657	0.944609		1.36915	0.8585		0.908822	0.351		0.75696	0.1185		ysnE			ysnE				ysnE									ysnE
ytbD	ytbD	GCTTACT	15	CATACAAC	predicted sE promoter	23	ytbD	1.85303	0.980481		1.26205	0.6745		NA	NA		1.02882	0.5415		ytbD			ytbD				ytbD									ytbD
yteV	yteV	TCATAAC	14	AATAGATT	GATAGAG	24	yteV	1.84217	0.978698		NA	NA		NA	NA		0.529312	0.102		yteV			yteV				yteV									yteV
yugT	yugT	TGCTGTA	14	CATAGGAT	predicted sE promoter	34	yugT	4.91041	0.999325		0.951913	0.4335		0.603383	0.062		0.404487	0.01		yugT			yugT				yugT									yugT
